# 1 **Explicit knowledge of task structure is the primary determinant of human model-based action**

2  
3 Pedro Castro-Rodrigues<sup>1-4,#</sup>, Thomas Akam<sup>2,5,#</sup>, Ivar Snorasson<sup>6</sup>, Marta Camacho, M<sup>1,a</sup>, Vitor Paixão<sup>2</sup>, J.  
4 Bernardo Barahona-Corrêa<sup>1-3,7</sup>, Peter Dayan<sup>8,9</sup>, H. Blair Simpson, H<sup>6,10</sup>, Rui M. Costa<sup>2,3,11</sup>, Albino J. Oliveira-  
5 Maia<sup>1-3,7,\*</sup>

6  
7 <sup>1</sup>Champalimaud Clinical Centre, Champalimaud Centre for the Unknown, Lisbon, Portugal;

8 <sup>2</sup>Champalimaud Research, Champalimaud Centre for the Unknown, Lisbon, Portugal;

9 <sup>3</sup>NOVA Medical School, Lisbon, Portugal;

10 <sup>4</sup>Centro Hospitalar Psiquiátrico de Lisboa, Lisbon, Portugal;

11 <sup>5</sup>Department of Experimental Psychology, University of Oxford, Oxford, UK;

12 <sup>6</sup>Center for Obsessive-Compulsive & Related Disorders, New York State Psychiatric Institute, New York,  
13 USA;

14 <sup>7</sup>Department of Psychiatry and Mental Health, Centro Hospitalar de Lisboa Ocidental, Lisbon, Portugal;

15 <sup>8</sup>Max Planck Institute for Biological Cybernetics, Tübingen, Germany;

16 <sup>9</sup>The University of Tübingen, Tübingen, Germany;

17 <sup>10</sup>Department of Psychiatry, Columbia University, New York, USA;

18 <sup>11</sup>Zuckerman Mind Brain Behavior Institute, Columbia University, New York, USA

19 # Equally contributing authors.

20 \*Corresponding author: [albino.maia@neuro.fchampalimaud.org](mailto:albino.maia@neuro.fchampalimaud.org)

21 <sup>a</sup>Current address: John Van Geest Center for Brain Repair, University of Cambridge, UK.

22

## 23 **Abstract**

24

25 Explicit information obtained through instruction profoundly shapes human choice behaviour. However, this  
26 has been studied in computationally simple tasks, and it is unknown how model-based and model-free  
27 systems, respectively generating goal-directed and habitual actions, are affected by the absence or  
28 presence of instructions. We assessed behaviour in a novel variant of a computationally more complex  
29 decision-making task, before and after providing information about task structure, both in healthy volunteers  
30 and individuals suffering from obsessive-compulsive (OCD) or other disorders. Initial behaviour was model-  
31 free, with rewards directly reinforcing preceding actions. Model-based control, employing predictions of  
32 states resulting from each action, emerged with experience in a minority of subjects, and less in OCD.  
33 Providing task structure information strongly increased model-based control, similarly across all groups.  
34 Thus, explicit task structural knowledge determines human use of model-based reinforcement learning, and  
35 is most readily acquired from instruction rather than experience.

36

## 37 **Introduction**

38

39 The brain uses multiple systems to choose which actions to perform<sup>1-6</sup>. One widely held distinction is made  
40 between goal-directed actions, guided by predictions of their specific outcomes, and habitual actions,  
41 performed according to preferences acquired through prior reinforcement<sup>1,7-9</sup>. This cognitive and  
42 behavioural classification is thought to correspond, at least in part, to a computational distinction between  
43 two different types of reinforcement learning (RL), termed model-based and model-free<sup>4,5,10,11</sup>. Model-based  
44 RL learns to predict the specific consequences of actions, and computes their values, i.e. long run utilities,  
45 by simulating likely future behavioural trajectories. This allows for statistically efficient use of experience,  
46 and thus behavioural flexibility, at the cost of the computational demands of planning. Model-free RL, by  
47 contrast, learns estimates of the value of states or actions directly from experience, and updates these  
48 estimates using reward prediction errors. This allows for rapid action selection at low computational cost,  
49 but uses information less efficiently, resulting in slower adaptation to changes in the environment. It is thought  
50 that the brain takes advantage of the complementary strengths of both prospective (model-based) and  
51 retrospective (model-free) approaches to decision-making, through mechanisms that estimate whether the  
52 payoff for more accurate prediction is worth the computational costs of planning<sup>4,12,13</sup>.

53 Sequential, or multi-step, decision tasks have emerged as a powerful approach to study model-based and  
54 model-free RL in humans<sup>11,12,14,15</sup>. In such tasks, subjects move through a sequence of states to obtain  
55 rewards, typically with non-stationary reward and/or action-state transition probabilities, forcing continuous  
56 learning. The contributions of model-based and model-free RL can be determined by examining how  
57 subjects update their choices in light of recent experience. To date, the most commonly used task is the  
58 'two-step' task, employing a choice between two 'first-step' stimuli, which leads probabilistically to one of  
59 two 'second-step' states, where rewards may be obtained<sup>11</sup>. Each first-step stimulus commonly leads to  
60 one of the second-step states but, on a minority of trials, leads to the state commonly reached from the  
61 other stimulus. Model-based and model-free RL are identified according to how the trial outcome (rewarded  
62 or not) and state transition (common or rare) interact to affect the subsequent choice. Under model-free  
63 control, the agent will tend to repeat first-step choices that are followed by reward, irrespective of the state  
64 transition. By contrast, under model-based control, the agent will tend to switch first-step choice when a  
65 rare transition leads to reward, as the reward increases the value of the state commonly reached from the  
66 not-chosen first step option. The two-step task has been used to study neural correlates of model-based  
67 and model-free control in healthy subjects<sup>11,16,25,26,17-24</sup>, and to investigate decision making in clinical  
68 populations<sup>27-31</sup>.

69 Human subjects typically receive extensive instruction about task structure prior to performing the two-step  
70 task<sup>11,32</sup>. However, and even though there is extensive literature showing that instruction profoundly shapes  
71 human behaviour in operant<sup>33-35</sup> and fear<sup>36,37</sup> conditioning, as well as value-based decision making<sup>38-41</sup>,  
72 little is known about how instruction affects behaviour in multi-step tasks that dissociate model-based and  
73 model-free control. To our knowledge, a single study in healthy humans has partially addressed this  
74 question, showing that making instructions more comprehensive and easier to understand, increases the  
75 influence of model-based relative to model-free RL<sup>32</sup>. This result, in combination with other analyses, led  
76 the authors to propose that humans are primarily model-based learners on this task, suggesting that  
77 apparent model-free behaviour, including in some clinical populations, may result from incorrect task  
78 models, rather than a true model-free strategy.

79 However, no studies have explored behaviour on multi-step tasks in the absence of information about task  
80 structure, in either healthy or clinical populations. Thus, it remains unclear how model-based and model-  
81 free RL contribute to action selection in situations where subjects must learn task structure directly and  
82 exclusively from experience, and how providing explicit information about task structure affects each  
83 system. To address these questions, we created a new version of the two-step task, requiring minimal prior  
84 instruction and we initially administered it with no information given about the task state space, transition  
85 structure, or reward probabilities. Then, the task was repeated following debriefing about these elements  
86 of the task's structure. Behaviour was tested in healthy volunteers, as well as in a sample of individuals  
87 with obsessive-compulsive disorder (OCD), previously reported to have deficits in the degree to which  
88 model-based RL is employed<sup>28,30</sup>. To control for the effects of psychotropic medication and of unspecific  
89 mood and anxiety symptoms, data was also collected in a comparison sample of individuals with mood and

90 anxiety disorders. Initial behaviour, prior to instructions, was model-free across all groups, with model-  
91 based control emerging with experience in only a minority of subjects, and to a lesser extent in OCD.  
92 However, once task structure information was provided, model-based control increased to a very similar,  
93 and significant extent in healthy volunteers and individuals with OCD or other disorders. These findings  
94 support the conclusion that explicit task structural knowledge determines human use of model-based RL,  
95 and is most readily acquired from instruction rather than experience.

96

## 97 **Results**

98

99 We developed a two-step task requiring minimal prior instruction, which we name ‘simplified two-step task’,  
100 by simplifying the visual representation of task states on the screen, the task structure (allowing only a  
101 single action rather than a choice in each second-step state), and the reward probability distribution (using  
102 blocks, instead of slowly fluctuating Gaussian random walks, to increase the contrast between good and  
103 bad options<sup>42,43</sup>; Figure 1). Two-hundred and four individuals were recruited in Lisbon and New York to  
104 perform this task: 109 were healthy volunteers, 46 were diagnosed with OCD and 49 with other mood and  
105 anxiety disorders. Sociodemographic and psychometric data from all participants is shown in table 1. While  
106 differences between groups were not found for age ( $F=2.4$ ,  $P=0.1$ ; one-way ANOVA) nor gender ( $\chi^2=5.1$ ,  
107  $P=0.3$ ; Pearson’s chi-squared), they were present for years of education ( $F=5.7$ ,  $P<0.01$ ; one-way ANOVA),  
108 which were only slightly, but significantly, higher in healthy volunteers than the mood and anxiety group  
109 ( $P=0.01$ ; Tukey’s HSD). As expected, both clinical groups had significantly higher anxiety and depression  
110 scores than healthy volunteers ( $F>55$ ,  $P<0.001$ ; across all one-way ANOVA’s for the depression and  
111 anxiety scales), while participants with OCD had higher obsessive-compulsive scores than participants in  
112 either of the two other groups ( $F>200$ ;  $P<0.001$ ; across all one-way ANOVA’s for the Yale-Brown  
113 Obsessive-Compulsive Scale total and sub-scores).

114 While developing the task among healthy volunteers in Lisbon, participants were randomized between two  
115 different versions, one with fixed transition probabilities linking the first-step actions and second-step states  
116 (Fixed version;  $n=40$ ), and one where the transition probabilities underwent periodic reversals (Changing  
117 version;  $n=42$ ). The Changing version proved too complex for most subjects (see supplementary results for  
118 details) so we subsequently focused on the Fixed task, which is used for all data and figures in the main  
119 text. All healthy controls recruited in New York ( $n=27$ ), and all clinical subjects at both sites ( $n=95$ ) were  
120 run on this version. All subjects in both versions performed 4 sessions of 300 trials each in a single day. A  
121 subset of healthy controls, and all clinical subjects, were debriefed between sessions 3 and 4, with the task  
122 structure explained to them. We assessed the effect of uninstructed experience by comparing behaviour  
123 between sessions 1 and 3, and the effect of explicit knowledge by comparing behaviour between sessions  
124 3 and 4.

125

### 126 **Initial behaviour is under model-free control**

127 As subjects were not told how their actions (arrow key presses) affected the stimuli shown on the screen,  
128 they had to learn both the correspondence between arrow keys and stimuli, and that stimuli could only be  
129 selected when highlighted. In the 67 healthy volunteers performing the Fixed version of the task, the number  
130 of invalid key presses per trial (i.e. presses to keys whose corresponding stimulus was not highlighted)  
131 decreased over the first 50-100 trials, before stabilising at a low level in all but a minority of subjects (Figure  
132 S1). To assess how trial events affected subject’s choices, we analysed the probability of repeating first-  
133 step choices (termed ‘stay probabilities’) as a function of the previous state transition (common or rare),  
134 trial outcome (rewarded or not), and their interaction<sup>11</sup>. During session 1, stay probability was strongly  
135 influenced by trial outcome ( $P<0.0001$ , permutation test), but not by state transition ( $P=0.3$ ) nor the  
136 transition-outcome interaction ( $P=0.1$ ; Figure 2 a, d). This pattern is consistent with a simple model-free  
137 strategy, in which the outcome received at the end of the trial directly reinforces the choice made at the  
138 first-step<sup>11</sup>. This direct reinforcing effect of reward was evident from the very start of the first session (Figure  
139 2b), rather than emerging with task experience. Although state transitions in session 1 did not influence  
140 subsequent first-step choices, key-press reaction times at the second-step were faster following common  
141 than rare transitions ( $399.1 \pm 16.9\text{ms}$  and  $514.4 \pm 20.5\text{ms}$  respectively;  $t_{66}=7.81$ ,  $P<0.0001$ , paired t-test;

**Fig. 1) Behavioural task**

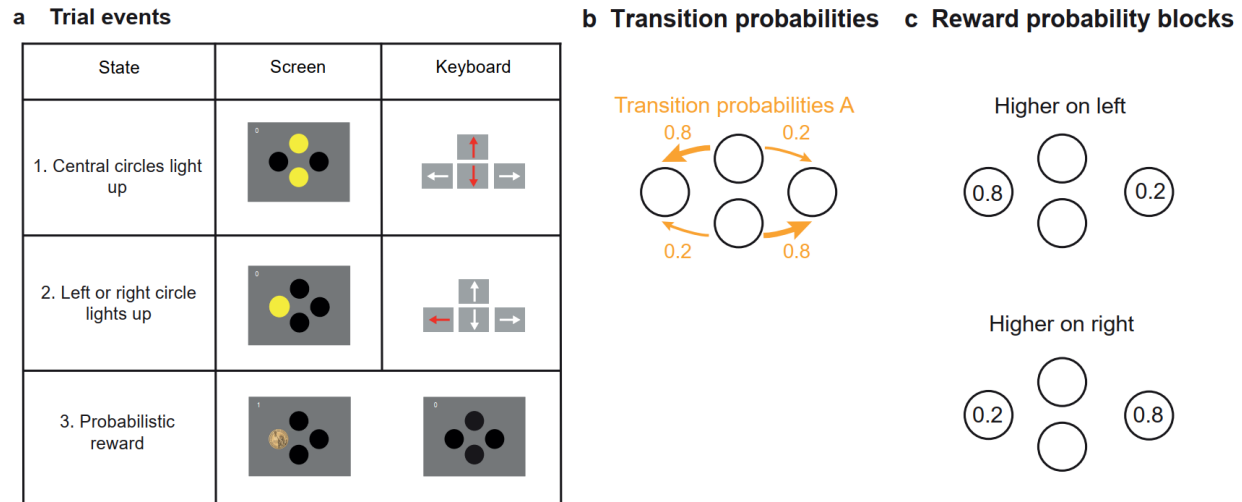

**Figure 1. Behavioural Task.** The simplified two-step task was presented on a computer screen with 4 circles visible on a grey background: 2 central circles (upper and lower) and two side circles (right and left). Each circle was coloured yellow when available for selection, and black when unavailable. Circles could be selected by pressing the corresponding arrow key (up, down, left or right) on the computer keyboard. **a)** Trial events. Each trial started with the central circles turning yellow, prompting the choice between either upper or lower circle (a1). Following the first-step choice, one of the side circles (left or right) would become yellow (a2), with differing probabilities (also see b). The subject would then select the yellow side circle resulting in a probabilistic monetary reward. Reward was indicated by the side circle changing to the image of a coin (a3 left) while no reward was indicated by the circle changing back to black (a3 right; also see c). **b)** Transition probabilities. At each trial, choosing one circle at the first step commonly ( $p=0.8$ ) lit up one side circle and rarely ( $p=0.2$ ) the other side circle, with inverse probabilities for choosing the alternate circle. Type A transition probabilities (common transitions from upper to left and from lower to right) are shown here. Reverse transition probabilities (Type B) are the alternate possibility. The transition probabilities were fixed (either A or B, counterbalanced across subjects) in the Fixed version of the task, or underwent reversals from A to B in the Changing version (see methods and supplementary results for additional details on this version). **c)** Reward probability blocks. The reward probabilities upon selection of the side circles changed in blocks that were either neutral ( $p=0.4$  for both left and right sides), or higher on one of the sides ( $p=0.8$  vs  $p=0.2$ , i.e., non-neutral blocks), as shown here. Non-neutral blocks ended when subjects consistently chose the first-step option (upper or lower) that most frequently lead to the high reward probability side. Neutral blocks ended probabilistically, independent of subjects' behaviour (see methods for details). To maximize reward rate, subjects must choose the first step action which commonly leads to the second-step state with higher reward probability, tracking the best option across reward-probability reversals.

142 Figure 2e). This dissociation may reflect motor systems learning to predict and prepare upcoming actions  
 143 before decision making systems are using a predictive model to evaluate choices.  
 144

145 Uninstructed experience has limited effects on model-based control

146 To assess how task experience affected behavioural strategy we compared behaviour in sessions 1 and 3.  
 147 Stay probability at session 3 was more strongly influenced by both state transition ( $P=0.004$ , permutation  
 148 test) and the transition-outcome interaction ( $P=0.002$ ), while the influence of trial outcome increased only  
 149 at trend level ( $P=0.06$ ; Figure 2 c, d). This pattern is consistent with increased influence of model-based  
 150 control, as model-based agents know that outcomes following rare transitions primarily influence the value  
 151 of the first-step option that was not chosen<sup>11,42</sup>, leading to loading on the transition-outcome interaction  
 152 predictor. Importantly, loading on the transition–outcome interaction parameter across sessions 1 to 3 was

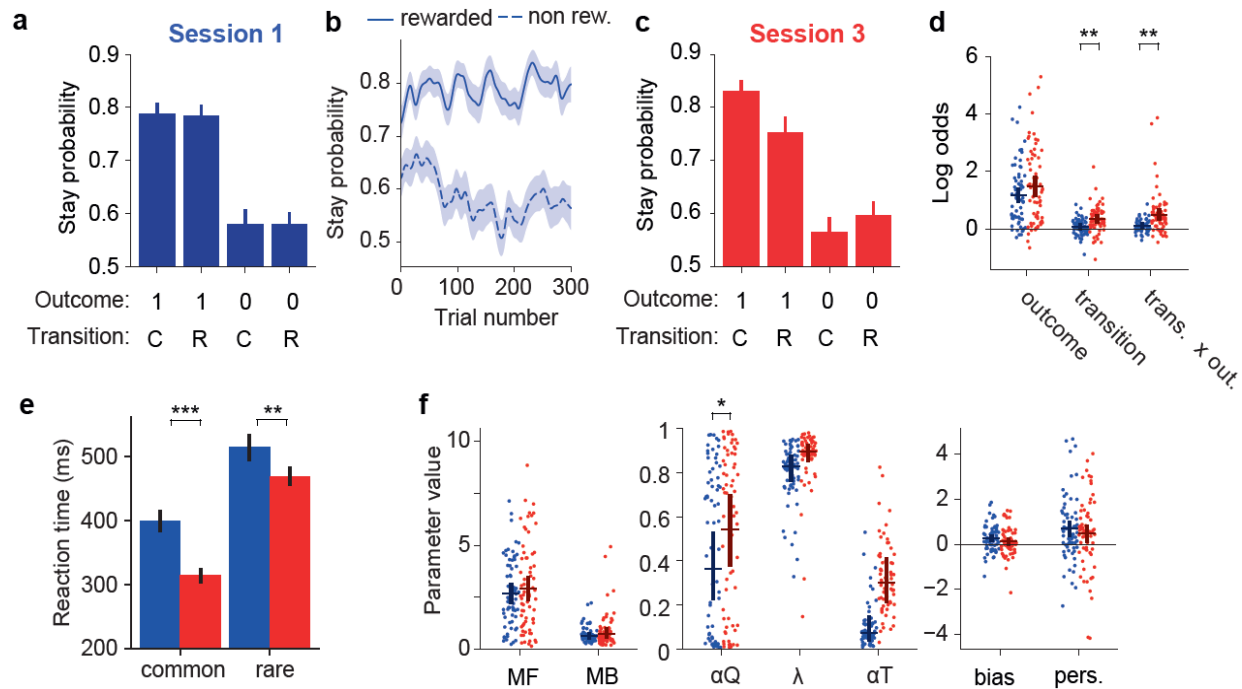

**Figure 2. Uninstructed behaviour is predominantly model-free.** **a)** Session 1 stay probability analysis showing the probability of repeating the first step choice on the next trial as a function of trial outcome (rewarded or not rewarded) and state transition (common or rare) across 67 healthy volunteers. Error bars indicate across subject standard error (SEM). **b)** Stay probability for rewarded and non-rewarded trials as a function of trial number in session 1. Shaded area shows across subject standard error. **c)** Stay probabilities for session 3. **d)** Logistic regression analysis of how the outcome (rewarded or not), transition (common or rare) and their interaction, predict the probability of repeating the same choice on the subsequent trial. Dots indicate maximum a posteriori parameter values for individual subjects, bars indicate the population mean and 95% confidence interval of the mean. In this and other panels, blue indicates session 1 while red indicates session 3. **e)** Reaction times after common and rare transitions in session 1 and 3. **f)** Comparison of mixture model fits between session 1 and session 3. Dots and bars are represented as in panel C. RL model parameters: MF: Model-free strength, MB: Model-based strength,  $\alpha Q$ : Value learning rate,  $\lambda$ : Eligibility trace,  $\alpha T$ : Transition prob. learning rate, bias: Choice bias, pers.: Choice perseveration. In all figures significant differences are indicated as: \*  $P < 0.05$ , \*\*  $P < 0.01$ , \*\*\*  $P < 0.001$ .

153 positively correlated with the number of rewards obtained by each subject ( $\rho = 0.67$ ,  $P < 0.001$ ), suggesting  
 154 that subjects who learned a model of the task obtained rewards at a higher rate. Furthermore, we have  
 155 previously shown that, when transition probability estimates are updated based on experienced state  
 156 transitions, as is the case here, model-based agents tend to repeat the same choice after common  
 157 transitions, producing a positive coefficient for state transition as a predictor of stay probability<sup>42</sup>. Increased  
 158 loading on the state transition predictor thus provides added support for development of model-based  
 159 control with task experience between sessions 1 and 3. While key-press reaction times at the second-step  
 160 became faster overall between session 1 and 3 (main effect of session  $P < 0.0001$ , repeated measures  
 161 ANOVA), this was more pronounced following common than rare transitions (session-transition interaction  
 162  $P = 0.008$ ; Figure 2e).

163 To further explore model-free and model-based control prior to receiving instructions, we fit RL models to  
 164 data from sessions 1-3. Model-comparison combining data from sessions 1-3 indicated that a mixture model  
 165 including model-free and model-based components fit data better than a purely model-free or a purely  
 166 model-based model, as reflected by lower Bayesian Information Criteria (BIC) scores for the mixture model



167 (Figure S2, left panel). Models that included a “bias” parameter, capturing bias towards the upper or lower  
168 first-step choice, and a “perseveration” parameter, capturing a tendency to repeat the previous choice, fit  
169 the data better than a model not including these parameters (Figure S2, right panel). To assess uninstructed  
170 learning effects, we compared parameter values of the fitted models for sessions 1 and 3. The value  
171 learning rate increased significantly between session 1 and 3 ( $P=0.04$ , permutation test), but no other  
172 parameter changed significantly, including the strength of model-based control (Figure 2f). The discrepancy  
173 with increased loading on the ‘transition x outcome’ predictor in the stay-probability analysis may reflect  
174 lower statistical power to detect subtle strategy changes in the strongly non-linear and higher parameter  
175 count RL model. This is supported by findings from model comparison for individual subjects between the  
176 mixture RL model and a simpler model-free RL model, indicating that only about 15% of subjects (10/67)  
177 had learned to use model-based RL at session 3 (likelihood ratio test, threshold  $P=0.05$ ). Overall, this data  
178 shows that model-free RL dominated initial human behaviour in this unfamiliar domain and remained the  
179 strongest influence on choice behaviour for most subjects over the 900 uninstructed trials.

180

### 181 In OCD uninstructed behaviour is biased towards model-free control

182 Ninety-five individuals with either OCD or other mood and anxiety disorders (Table 1) also completed the  
183 Fixed version of the simplified two-step task. In the stay probability analysis, when comparing session 1  
184 with session 3, the OCD group ( $n=46$ ) did not show the increased influence of transition or transition-  
185 outcome interaction that was seen in healthy controls ( $P=0.08$  and  $P=0.71$  respectively; Figure 3a, b).  
186 Instead there was an increased influence of trial outcome over uninstructed learning ( $P=0.001$ ), not seen  
187 in controls, that may reflect enhanced model-free control with experience. However, in direct comparisons  
188 with healthy volunteers ( $n=67$ ), session by group interaction was significant only for the transition-outcome  
189 interaction parameter ( $P=0.01$ ), but not for the transition ( $P=0.6$ ) or outcome parameters ( $P=0.2$ ).

190 As in healthy subjects, second-step reaction times were faster following common than rare transitions (main  
191 effect of transition,  $P<0.0001$ , repeated measures ANOVA; Figure 3c), and also faster in session 3 than  
192 session 1 (main effect of session,  $P=0.003$ ). However, the session by transition interaction did not reach  
193 significance ( $P=0.2$ ), indicating that for this group the effect of experience on RT did not differentiate  
194 between common and rare transitions. Directly comparing OCD and healthy volunteers, while individuals  
195 with OCD had slower reaction times overall ( $P=0.03$ , linear mixed model), interactions with group were not  
196 significant for session ( $P=0.9$ ), transition ( $P=0.4$ ), nor session by transition interaction ( $P=0.7$ ). Finally,  
197 consistent with the stay probability analysis, RL mixture model fits to sessions 1 and 3 (Figure 3c) showed  
198 an increase in the influence of model-free action values on choice over learning ( $P=0.008$ , permutation  
199 test), that was not seen in healthy volunteers, with a trend toward significant session-by-group interaction  
200 ( $P=0.07$ ).

201 To investigate potential contributions of medication or of unspecific mood and anxiety symptoms for the  
202 findings in the OCD group, equivalent experiments and comparisons were performed in a sample of  
203 individuals with other mood and anxiety disorders ( $n=49$ ). Here, in stay probability analysis (Figure 3e, f)  
204 we found an increased influence of trial outcome ( $P<0.001$ ) and transition ( $P=0.01$ ) with task experience,  
205 but not the transition-outcome interaction predictor ( $P=0.7$ ). Second-step reaction times were faster  
206 following common than rare transitions (main effect of transition,  $P<0.0001$ , Figure 3g), and faster in session  
207 3 than session 1 (main effect of session,  $P<0.0001$ ), but the session by transition interaction was not  
208 significant ( $P=0.4$ ). Compared with the healthy volunteers, this group had slower second-step reaction times  
209 overall (main effect of group,  $P=0.03$ ), but particularly on rare transition trials (transition by group interaction,  
210  $P=0.03$ ). Finally, RL model fits showed only an increased value learning rate ( $P=0.01$ ), but no changes in  
211 the influence of model-free or model-based action values on choice over learning (Figure 3h). Importantly,  
212 there were no significant session by group interactions between these patients and healthy volunteers for  
213 the stay probability analysis or RL model fits. Overall, these data suggest a different pattern of learning from  
214 experience in individuals with OCD, with a failure to learn the task-transition structure and exhibit model-  
215 based RL, but an increased influence of model-free action values.

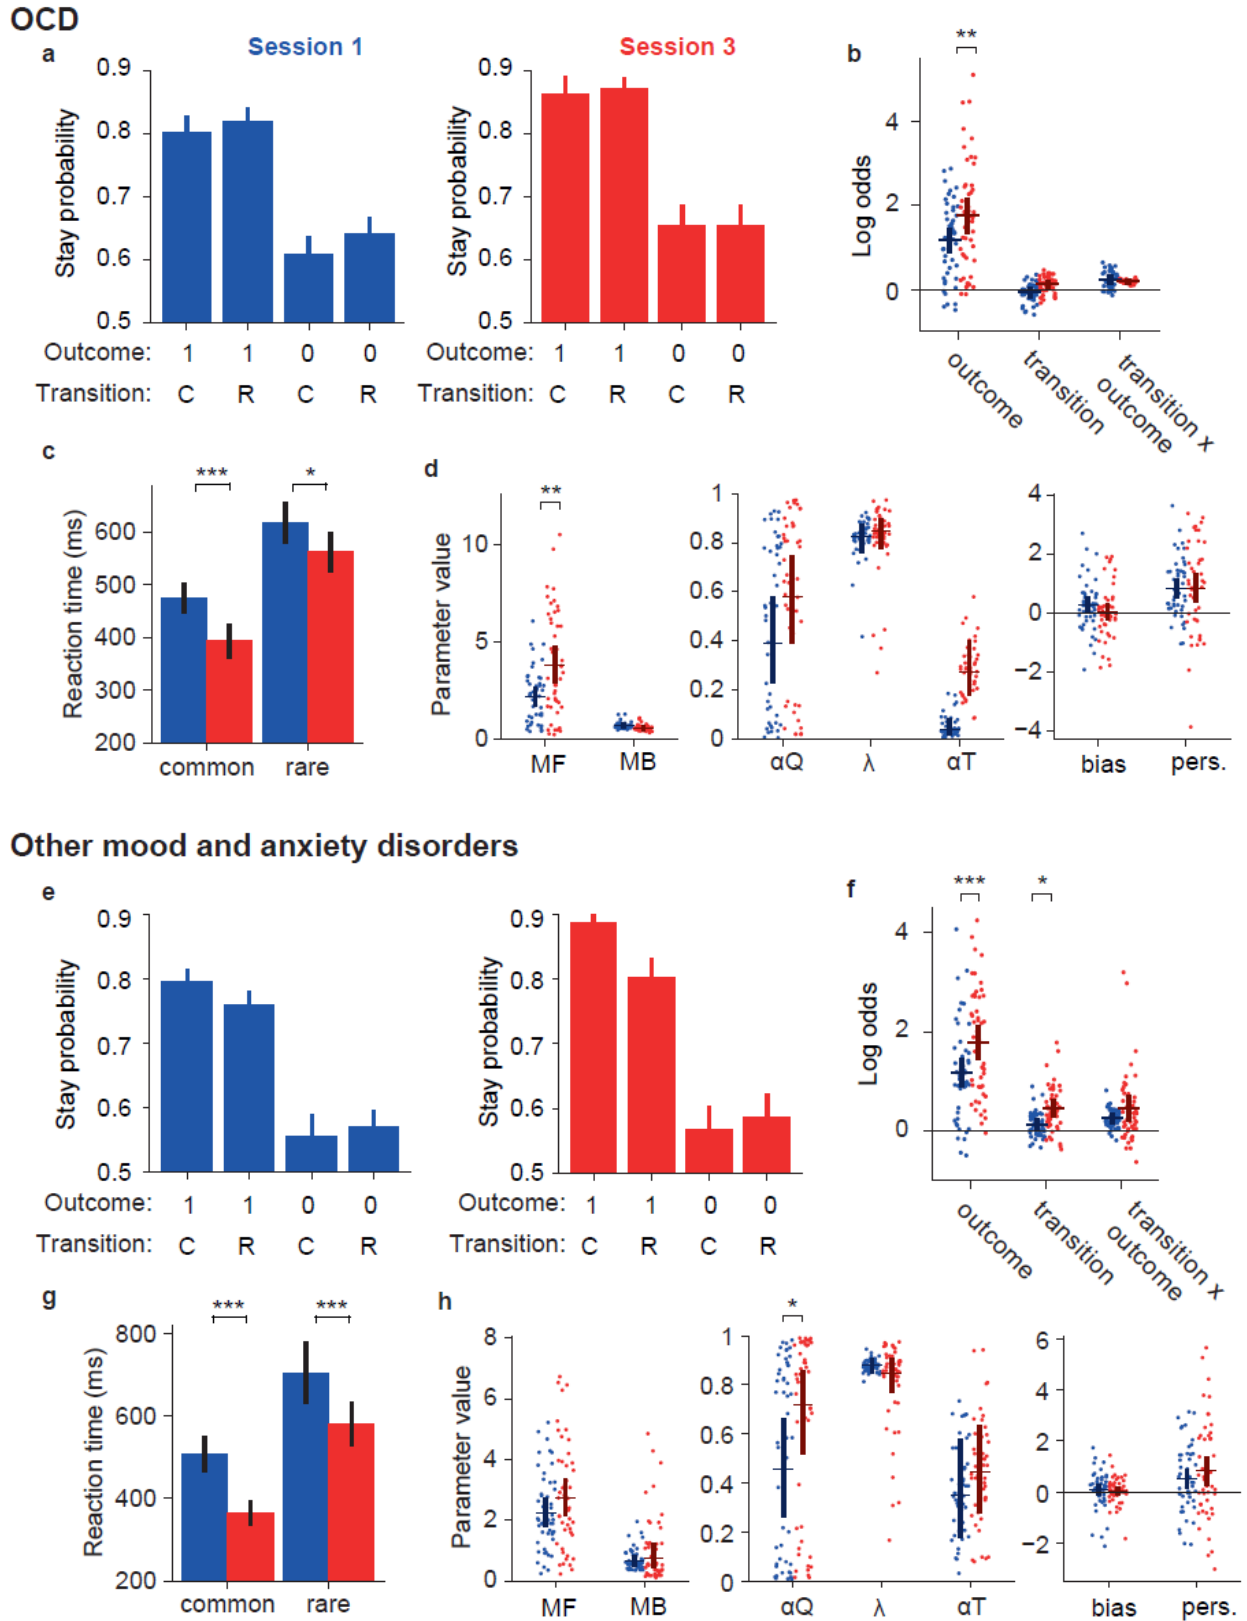

**Figure 3. Uninstructed behaviour is biased towards model-free control in OCD.** Data for individuals with OCD ( $n=46$ ) is represented in panels a-c while that for individuals with other mood and anxiety

disorders (n=49) are in panels d-f. **(a, d)** Stay probability analysis showing the probability of repeating the first step choice on the next trial as a function of trial outcome (rewarded or not rewarded) and state transition (common or rare). Error bars indicate the cross subject standard error of the mean (SEM). The left (blue) panel shows data from the first session, the right (red) panel shows data from session 3. **(b, e)** Logistic regression analysis of how the outcome (rewarded or not), transition (common or rare) and their interaction, predict the probability of repeating the same choice on the subsequent trial. Dots indicate maximum *a posteriori* loading for individual subjects, bars indicate the population mean and 95% confidence interval on the mean. **(c, f)** Comparison of mixture model fits. Dots and bars are represented as in panels C and G. RL model parameters: MF, Model-free strength; MB, Model-based strength;  $\alpha Q$ , Value learning rate;  $\lambda$ , Eligibility trace;  $\alpha T$ , Transition probability learning rate; bias, Choice bias; pers., Choice perseveration.

216

217 Explicit knowledge reduces model-free and increases model-based control.

218 We next assessed how providing explicit information about the task structure changed behaviour, by  
219 comparing behaviour in sessions 3 and 4 in a group that received debriefing about task structure after  
220 session 3, and in another group that was not provided such information. To avoid ceiling effects in subjects  
221 who already acquired a model of the task, these analyses only included the 57 subjects for whom a  
222 likelihood ratio test indicated model-based RL was not being used significantly in session 3, as described  
223 above. Among these subjects, in session 4, more than 50% of those that were debriefed were identified by  
224 the likelihood-ratio test as using model-based RL (21/41), while in the absence of debriefing, only one  
225 subject became model-based (1/16;  $z=3.13$ ,  $P=0.002$ , z-test for difference in proportions; Figure 4a, f).  
226 Consistently, debriefing strongly affected how events on each trial influenced the subsequent choice (Figure  
227 4b, c, g, h), with increased influence of state transition ( $P<0.001$ ; session by group interaction  $P=0.03$ ;  
228 permutation tests) and transition-outcome interaction ( $P<0.001$ ; session by group interaction  $P=0.01$ ) on  
229 stay probability.

230 RL mixture model fits of pre and post debriefing data (Figure 4e, j) confirmed that the influence of model-  
231 based action values on choice was increased by debriefing ( $P<0.001$ ; session by group interaction  $P=0.01$ ).  
232 Furthermore, the influence of model-free action values on choice reduced after debriefing ( $P=0.008$ ), while  
233 value learning rates increased ( $P<0.001$ ), though the session by group interactions were not significant  
234 ( $P=0.7$  and  $P=0.6$  respectively). In addition to modifying choice behaviour, debriefing increased differences  
235 in second-step key-press reaction times between common and rare transition trials (session-transition  
236 interaction  $P<0.0001$ , repeated measures ANOVA; Figure 4d), further supporting that the influence of state  
237 transition on RT in this task comprises both a motor component, which is independent of the use of model-  
238 based RL, and a cognitive component which manifests when subjects are using model-based RL. No  
239 significant differences were found for any comparisons between sessions 3 and 4 in the no debriefing group  
240 (Figure 4f-j).

241 Finally, among participants recruited in Lisbon, where neuropsychological data was available, we tested for  
242 correlations between test scores, namely from the Corsi block tapping test (assessing visuospatial working  
243 memory) and a Go/No-Go task (number of No-Go errors and reaction-time, assessing impulsivity), with  
244 several behavioural measures, specifically the outcome and transition-outcome interaction logistic  
245 regression predictor loadings, as well as the RL model parameters controlling the influence of model-free  
246 and model-based values on choice. Significant correlations were not found, neither among all healthy  
247 volunteers using data from session 3 ( $-0.27<r<0.31$ ;  $0.054<P<0.8$ ), nor among the debriefing group using  
248 data from session 4 ( $-0.45<r<0.38$ ;  $0.07<P<0.8$ ).



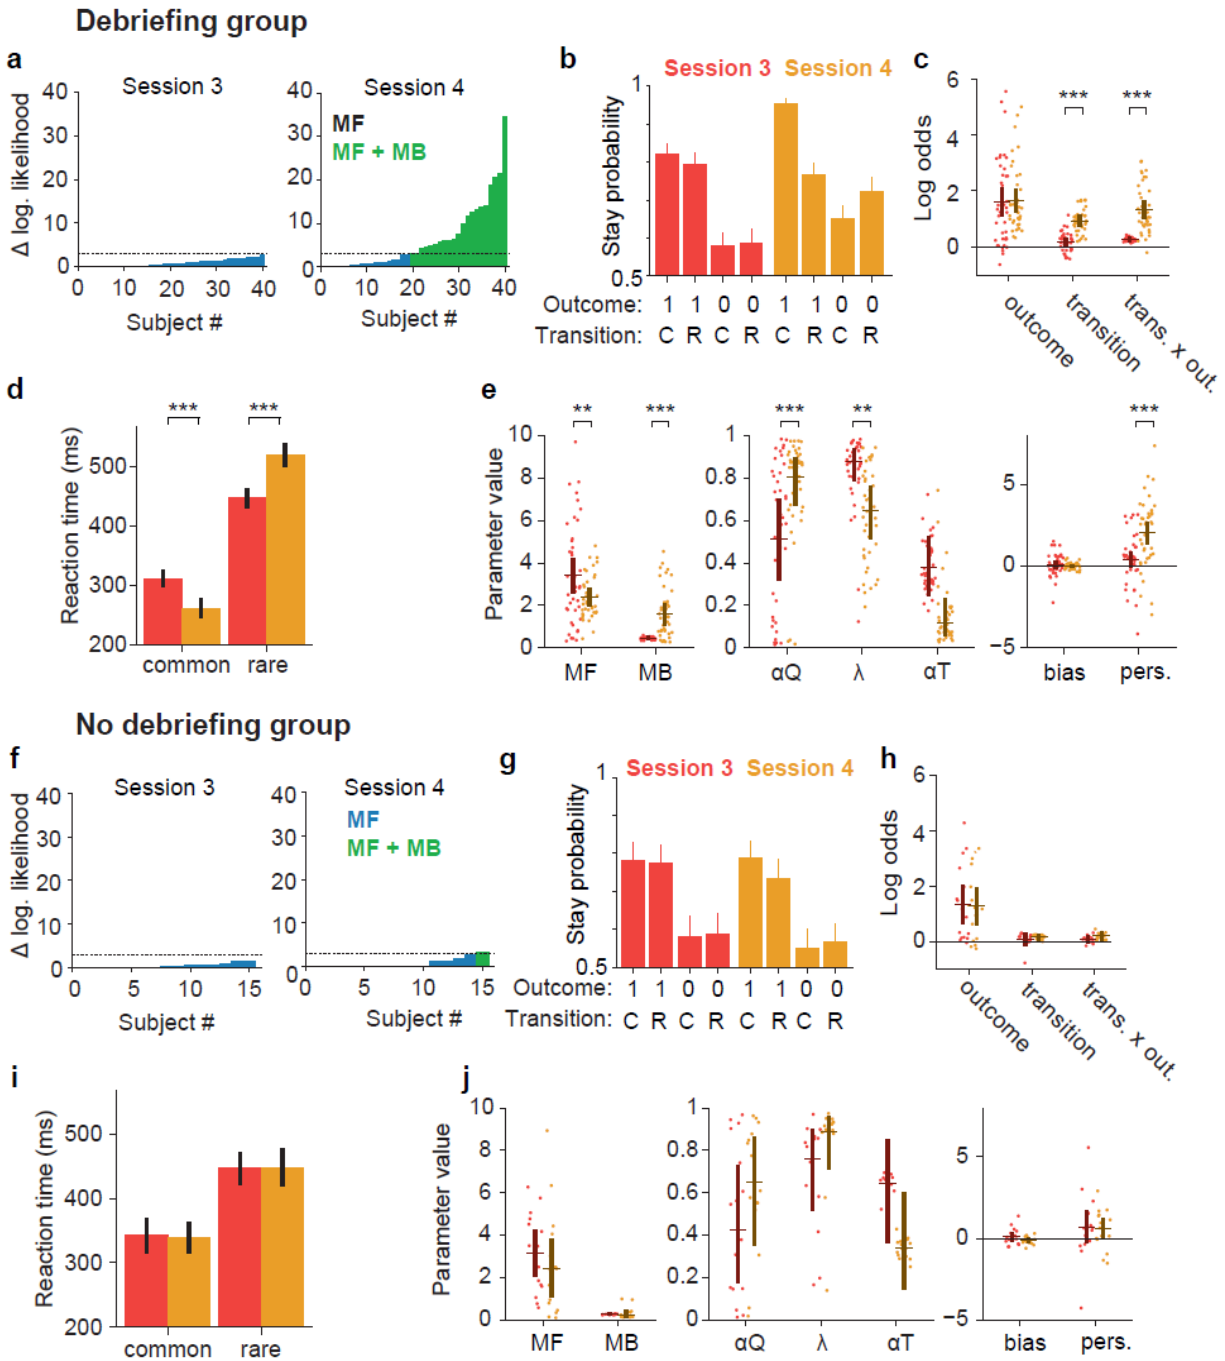

**Figure 4. Explicit knowledge modifies the balance between model-based and model-free control.**

(a, f) Per-subject likelihood ratio test for use of model-based strategy on session 3 (left panel) and session 4 (right panel) among 57 healthy volunteers that did not use model-based RL significantly in session 3, as indexed by a likelihood ratio test. Data were analysed separately for groups with (a) and without (f) debriefing. Y-axis shows difference in log likelihood between a mixture (model-free and model-based) RL model and a model-free only RL model, with blue bars indicating subjects for whom the test favours the latter model, and green bars the subjects using a mixture model, using a  $p < 0.05$  threshold for rejecting the simpler model. (b, g) Stay probability analysis showing the probability of repeating the first step choice on the next trial as a function of trial outcome (rewarded or not rewarded) and state transition (common

or rare). In these and remaining panels, red indicates session 3 (before instruction in the debriefing group) while yellow indicates session 4 (after instruction in the debriefing group). Error bars indicated the cross subject standard error of the mean (SEM). **(c, h)** Logistic regression analysis of how the outcome (rewarded or not), transition (common or rare) and their interaction, predict the probability of repeating the same choice on the subsequent trial. Dots indicate maximum a posteriori parameter values for individual subjects, while bars indicate the population mean and 95% confidence interval on the mean. **(d, i)** Cumulative distribution of reaction times for common and rare transitions. **(e, j)** Comparison of mixture model fits. Dots and bars are as in panel c. RL model parameters: MF, Model-free strength; MB, Model-based strength;  $\alpha Q$ , Value learning rate;  $\lambda$ , Eligibility trace;  $\alpha T$ , Transition probability learning rate; bias, Choice bias; pers., Choice perseveration.

249

#### 250 Explicit knowledge affects model-free value updates and choice perseveration

251 Unexpectedly, the RL model also indicated that the eligibility trace parameter decreased after debriefing  
252 ( $P=0.004$ ; session by group interaction  $P=0.03$ ). This parameter controls the relative influence of the  
253 second-step state's value and the trial outcome on updates to model-free first-step action values. Debriefing  
254 increased the influence of the second-step state value and decreased that of the trial outcome. As there is  
255 no obvious reason why providing task structure information should change model-free eligibility traces, we  
256 hypothesized that this effect is in fact mediated by the influence of task structural knowledge on  
257 representation of the task state space. By telling subjects that the reward probabilities depend on the  
258 second-step state reached, these states are likely made more distinct and salient in their internal  
259 representation of the task, and hence better able to accrue value, which can then drive model-free updates  
260 of first step action values. Consistent with this interpretation, subjects who, following debriefing, had large  
261 increases in the strength of model-based control, indicating that they had correctly understood the task  
262 structure, also had a larger decrease in the eligibility trace parameter ( $r=-0.34$ ,  $P=0.03$ ; Figure S3).

263 Debriefing also increased how often subjects repeated choices independent of subsequent trial events, as  
264 reflected by a significant increase in the 'perseveration' parameter of the RL model ( $P<0.001$ ; session by  
265 group interaction  $P=0.001$ ). This may result from information that reward probabilities on the left and right  
266 reversed only occasionally and are thus stable for extended periods of time. In this case, one would expect  
267 a reduction in perseveration across the course of each block, from shortly after a reversal, when reward  
268 probabilities are stable, to late in the block, when the next reversal is anticipated. Consistent with this  
269 hypothesis, we found that participants with larger post-debriefing increases in overall perseveration also  
270 had larger declines in perseveration within post-debriefing non-neutral blocks, from trials 10-20 (early) to  
271 30-40 (late;  $r=-0.35$ ,  $P=0.02$ ; Figure S3).

272 Since all participants in the no debriefing group were recruited in Lisbon, while the debriefing group also  
273 included participants from the New York site, all analyses were repeated including only participants  
274 recruited in Lisbon, which did not affect the results qualitatively (data not shown). Furthermore, we tested  
275 for differences in learning or debriefing effects between the Lisbon and New York debriefing groups, and  
276 did not find any significant differences (Supplementary table sT1).

277

#### 278 Explicit knowledge increases model-based control in OCD

279 In the 41 of 46 individuals with OCD that were model-free at session 3, 37% (15 subjects) started using  
280 model-based RL after debriefing (Figure 5a, likelihood ratio test with threshold  $P=0.05$ ). Consistent with  
281 this, the stay probability analysis showed increased loading on both the transition ( $P=0.002$ ) and transition-  
282 outcome interaction ( $P<0.001$ ) predictors, similarly to that observed in healthy controls (Figure 5b, c).  
283 Increased use of model-based RL after debriefing was confirmed by model fitting (Figure 5d), which showed  
284 increased influence of model-based action values on choice ( $P<0.001$ ), and a trend towards reduced  
285 influence of model-free action values ( $P=0.06$ ). As in healthy volunteers, debriefing in participants with  
286 OCD increased differences in second step reaction times between common and rare transition trials  
287 (session-transition interaction  $P<0.0001$ , repeated measures ANOVA; Figure 5d), while overall reaction  
288 times remained slower than in healthy volunteers ( $P=0.045$ , linear mixed model). Again similarly to healthy

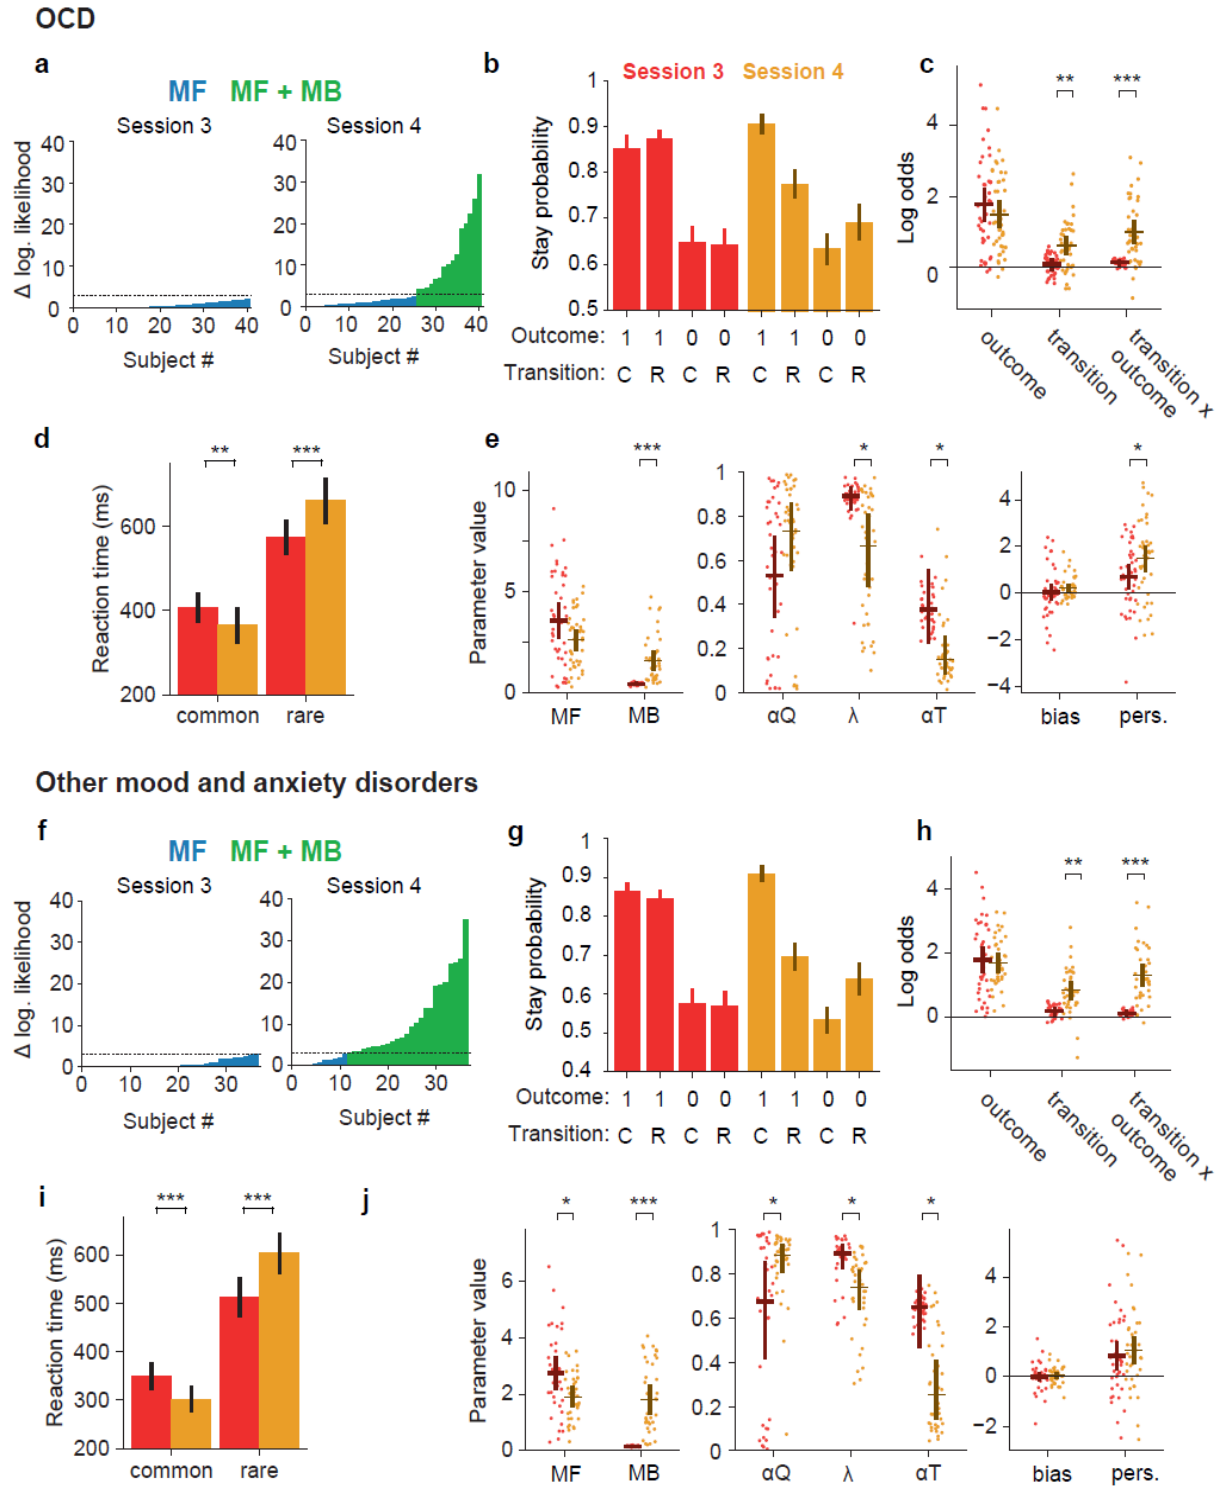

**Figure 5. Explicit knowledge enhances model-based control in OCD.** Among participants in the clinical groups, we analysed the effects of debriefing in 41 individuals with OCD (panels **a-e**) and 37 individuals with other mood and anxiety disorders (panels **f-j**) that did not use model-based RL in session 3. (**a, f**) Per-subject likelihood ratio test for use of model-based strategy on session 3 (left panel) and session 4 (right panel). Y-axis shows difference in log likelihood between mixture (model-free and model-based) RL model and model-free only RL model, with blue bars indicating subjects for whom the test

favours the model-free only model, and green bars the subjects using a mixture model, using a  $p < 0.05$  threshold for rejecting the simpler model. **(b, g)** Stay probability analysis showing the probability of repeating the first step choice on the next trial as a function of trial outcome (rewarded or not rewarded) and state transition (common or rare). Error bars indicated the cross subject standard error of the mean (SEM). In this and all panels, red indicates session 3 (before instruction) while yellow indicates session 4 (after instruction). **(c, h)** Logistic regression analysis of how the outcome (rewarded or not), transition (common or rare) and their interaction, predict the probability of repeating the same choice on the subsequent trial. Dots indicate maximum *a posteriori* loading for individual subjects, bars indicate the population mean and 95% confidence interval on the mean. **(d, i)** Cumulative distribution of reaction times for common and rare transitions. **(e, j)** Comparison of mixture model fits. Dots and bars are as in panel c. RL model parameters: MF, Model-free strength; MB, Model-based strength;  $\alpha_Q$ , Value learning rate;  $\lambda$ , Eligibility trace;  $\alpha_T$ , Transition probability learning rate; bias, Choice bias; pers., Choice perseveration.

289

290 volunteers, debriefing reduced the value of the eligibility trace parameter ( $P=0.01$ ), and this decrease  
291 correlated with increased use of model-based RL ( $r=-0.56$ ,  $P=0.0001$ ; figure S3). Though debriefing  
292 increased choice perseveration in OCD subjects ( $P=0.02$ ), the effect was significantly smaller than in  
293 healthy volunteers (session by group interaction  $P=0.04$ ), and unlike in healthy volunteers, did not correlate  
294 with decreases in perseveration from early to late in blocks after debriefing ( $r=-0.09$ ,  $P=0.5$ ; figure S3). This  
295 was the only significant interaction between debriefing and OCD diagnosis in direct comparisons with data  
296 from healthy volunteers for stay probability analysis and RL model fits.

297 In the group with other mood and anxiety disorders, among 37 subjects that were model-free at session 3,  
298 debriefing increased the influence of transition ( $P=0.002$ ) and transition-outcome interaction ( $P < 0.001$ )  
299 predictors on stay probability (Figure 5f, g), similarly to healthy volunteers and individuals with OCD. The  
300 RL model fit confirmed that debriefing increased the influence of model-based action values on choice  
301 ( $P < 0.001$ ), and reduced influence of model-free action values ( $P=0.016$ ; Figure 5h). As in the other groups,  
302 debriefing increased the difference in second-step reaction times between common and rare transition trials  
303 ( $P < 0.0001$ ), and there was no difference in reaction time effects between this group and healthy controls  
304 ( $P > 0.3$ ). Debriefing effects observed in healthy volunteers for the value learning rate and eligibility trace  
305 parameters were also replicated here ( $P=0.014$  and  $P=0.04$  respectively), with decrease in the latter again  
306 correlating with increased use of model-based RL ( $r=-0.45$ ,  $P=0.005$ ; figure S3). However, there was no  
307 effect of debriefing on choice perseveration ( $P=0.4$ ; session by group interaction  $P=0.001$ ), and no  
308 correlation across subjects between the debriefing effect on perseveration and post debriefing change in  
309 perseveration from early to late in blocks ( $r=-0.16$ ,  $p=0.36$ ). This was the only significant session by group  
310 interaction for stay probability analysis and RL model fits. Overall, this suggests that, with the exception of  
311 model-free strength, that was not significantly reduced by debriefing in individuals with OCD, both clinical  
312 groups were influenced by debriefing similarly to healthy volunteers, with all groups equally able to use the  
313 information about task structure to employ a model-based strategy.

314 To further explore potential effects of medication, we also tested for differences in RL strategies between  
315 the clinical groups recruited in Lisbon, the majority of whom were receiving pharmacological treatment  
316 (13/16 in OCD group, 14/16 in mood and anxiety disorders group), and the clinical groups recruited in New  
317 York, who were tested in the absence of such treatment. We found that debriefing reduced the strength of  
318 model-free RL and increased the value learning rate in treated, but not untreated, individuals with OCD  
319 ( $P=0.04$  for group-debriefing interactions in both cases; Supplementary table sT2, Supplementary figure  
320 s4). Among individuals with other mood and anxiety disorders, significant differences were not found  
321 between Lisbon and New York samples (Supplementary table sT3).

322 Finally, among clinical groups recruited in Lisbon, where neuropsychological data was available, we tested  
323 correlations between test scores from the Corsi block tapping test or a Go/No-Go task, and outcome or  
324 transition-outcome interaction logistic regression predictor loadings, as well as model-free or model-based  
325 the RL model parameters, as described above for healthy volunteers. While in the OCD group we did not  
326 find significant correlations (data not shown), in the with mood and anxiety disorder group there were  
327 significant positive correlations between reaction time in the Go/No-Go task and several measures of

328 model-based control, namely the transition-outcome interaction predictors from sessions 3 ( $r=0.69$ ;  
329  $P=0.007$ ), and 4 ( $r=0.54$ ;  $P=0.048$ ), and the fitted model-based strength parameter value from session 4  
330 ( $r=0.58$ ;  $P=0.03$ ). Other correlations were not significant.

331

## 332 **Discussion**

333 We developed a simplified two-step task to examine how model-based and model-free RL contribute to  
334 behaviour in healthy and clinical populations, when task structure must be learned directly from experience.  
335 This allowed for subsequent testing of modifications of behavioural strategies once information about task  
336 structure was provided. Uninstructed behaviour was initially model-free, with strong direct reinforcement of  
337 choices by rewards from the start of the first session, but no evidence of subjects using knowledge of task  
338 structure early on. In fact, even after extensive experience, model-based control emerged only in a minority  
339 of subjects. This is striking given the relative simplicity of the task and suggests that humans are surprisingly  
340 poor at learning causal models from experience when they lack prior expectations about task structure.  
341 When learning from experience, individuals with OCD were impaired in their use of model-based control  
342 and biased towards a model-free strategy. Providing explicit information about task structure strongly  
343 increased the use of model-based control, across all tested populations, including individuals with OCD,  
344 with additional unexpected effects on model-free action value updates and choice perseveration. The  
345 absence of a model-based control deficit in OCD following debriefing is surprising, given the compelling  
346 evidence for such deficits in the original two-step task. This raises questions about task properties  
347 underlying the different pattern of deficits and suggests the possibility that real-world deficits in OCD  
348 patients may be rather due to an excessive use of a model-free learning system.

349 The increasing influence of model-based RL with experience contrasts with habit formation in rodent  
350 instrumental conditioning, where actions are initially goal-directed but become habitual with extended  
351 experience<sup>44</sup>, a process thought to involve a transition from model-based to model-free control<sup>4</sup>. This  
352 transition, and arbitration between model-based and model-free control more generally, has been proposed  
353 to occur through meta-cognitive mechanisms which assess whether the benefits of improved prediction  
354 accuracy are worth the costs of model-based evaluation<sup>4,12,13</sup>. The different trajectory in the current task  
355 likely results from a more complex state space that increases model uncertainty in early learning and makes  
356 model-based learning more demanding, and from ongoing changes in reward probability that prevent the  
357 model-free system from converging to accurate value estimates in late learning<sup>4</sup>. In fact, it has been recently  
358 suggested that performance during initial stages of action selection tasks may be primarily based on trial-  
359 and-error exploration, with progression towards model-based RL occurring in intermediate stages, as  
360 subjects acquire a model of the environment<sup>45</sup>.

361 Our finding that model-free RL dominates uninstructed behaviour on a two-step task contrasts with recent  
362 arguments from Silva & Hare<sup>32</sup> that humans are primarily model-based learners on two-step tasks, and that  
363 apparent model-free behaviour is in fact model-based control using muddled or incorrect task models. We  
364 cannot rule out the possibility that some apparently model-free behaviour at later uninstructed sessions in  
365 our task was in fact model-based control with an incorrect model. However, we do not think this is a  
366 plausible overall explanation for the observed predominance of model-free behaviour prior to instructions.  
367 Firstly, because stay probabilities at session one showed a strong main effect of outcome but no transition-  
368 outcome interaction, i.e. the canonical picture of a model-free agent. This is not consistent with Silva and  
369 Hare's simulations of agents with muddled models, which show a strong effect of transition-outcome  
370 interaction<sup>32</sup>. Secondly, our subjects showed a direct reinforcing effect of reward on first-step choice from  
371 their very first interactions with the task. It does not appear likely that subjects almost instantly acquire  
372 muddled models of the task which happen to produce the exact effect predicted by model-free  
373 reinforcement. Rather, we propose that, consistent with findings as early as Thorndike's law of effect<sup>46</sup>,  
374 rewards in our task had a direct reinforcing effect on actions performed shortly prior to their being obtained.  
375 While these findings provide evidence that subjects use model-free control in unfamiliar domains, this  
376 speaks only indirectly to the question of whether model-free RL or muddled models underlie apparent  
377 model-free behaviour in the original two-step task.

378 Providing explicit information about task structure strongly boosted the influence of model-based RL and  
379 reduced the influence of model-free RL. This complements Silva and Hare's findings that model-based  
380 control is increased by making instructions more complete and embedding them in a narrative to make



381 them easier to remember and understand. Such instruction effects are consistent with meta-cognitive cost-  
382 benefit decision making, since an accurate model of the task structure will boost the estimated accuracy of  
383 model-based predictions and hence the expected payoffs from model-based control. Our findings also build  
384 on extensive literature examining how instruction and experience interact to determine human behaviour,  
385 in tasks that do not discriminate model-free and model-based control. Early work examining instruction  
386 effects on operant conditioning found that after explicit information about the schedule of reinforcement,  
387 responses match the contingencies explained to subjects (e.g. fixed interval, variable interval or fixed ratio),  
388 even when these differ substantially from the actual contingencies<sup>33-35</sup>. In common with our study, these  
389 results emphasize that humans learn about task structure much more readily from explicit information than  
390 via trial and error learning. More recent work has focused on the effect of advice, i.e. informing subjects  
391 that one option is particularly good or bad, on reward guided decision making in probabilistic settings<sup>38,39</sup>.  
392 Such advice impacts not only initial estimates of how good or bad different options are, but also modifies  
393 subsequent learning, by up-weighting and down-weighting outcomes. Whether such bias effects extend to  
394 learning about task structure, in addition to simple reward learning, is an open question for further work.  
395 Functional neuroimaging has also shown that instructions change responses to outcomes in the striatum,  
396 ventromedial prefrontal cortex and orbitofrontal cortex, potentially mediated by representations of instructed  
397 knowledge in the dorsolateral prefrontal cortex<sup>37,40,47</sup>. Our task provides a potential tool for extending such  
398 mechanistic investigation of instruction effects into the domain of task structure learning and model-based  
399 RL.

400 Our findings may have translational relevance for OCD. Prior studies have shown that individuals with OCD,  
401 as well as healthy volunteers with self-reported OCD-like symptoms, have deficits in model-based control  
402 in the original two-step task<sup>28,30</sup>. There is also data showing that these findings reflect a transdiagnostic  
403 compulsivity dimension, rather than an OCD-specific characteristic<sup>30,48</sup>. Consistent with these reports,  
404 comparing OCD subjects with healthy volunteers we found evidence for impaired acquisition of model-  
405 based control, and increased influence of model-free values, when learning directly and exclusively from  
406 experience. No difference was found in comparisons between healthy volunteers and individuals with other  
407 mood and anxiety disorders during uninstructed experience. Surprisingly, following debriefing we did not  
408 observe deficits in the ability of OCD subjects to adopt a model-based strategy, demonstrating that, under  
409 some conditions, individuals with OCD recruit model-based control as readily as healthy volunteers, which  
410 is of particular interest given the established efficacy of cognitive-behavioural therapy (CBT) in the treatment  
411 of OCD<sup>49</sup>. The evidence for increased influence of model-free values prior to instructions rather suggests  
412 that in OCD there may be a bias towards increased use of model-free RL, which is consistent with the view  
413 that OCD may be driven by an hyperactive habit system<sup>28,50,51</sup>. Potentially relevant regarding this  
414 hypothesis, while debriefing had no effect on use of model-free RL in non-medicated patients, this was  
415 reduced after debriefing in treated patients, with learning rates increased in medicated but not unmedicated  
416 participants with OCD. Treated OCD subjects were thus, in these respects, closer to healthy subjects.  
417 Although it has been shown that, in OCD subjects, cognitive-behavioural therapy does not change use of  
418 model-based control in the original two-step task<sup>52</sup>, our results suggest that pharmacological treatment may  
419 have an effect on the ability to suppress model-free control and modify behaviour once a correct model is  
420 acquired. We did make a trend observation that the influence of model-free values on choices increases  
421 with experience in OCD, but not in healthy volunteers (group difference:  $P = 0.07$ ). Given the clinical  
422 relevance of this observation, it would be valuable to attempt a formal replication, potentially using more  
423 extensive training in studies including clinical samples.

424 There are substantial differences between our paradigm and the original two-step task, that may explain  
425 the different pattern of deficits observed in individuals with OCD. Our task is structurally simpler due to  
426 having no choice at the second-step, which will reduce working memory load and hence make model-based  
427 control easier. Indeed, while in the original two-step task working memory capacity is correlated with the  
428 use of a model-based strategy<sup>19,20</sup>, we did not find any such correlations here, neither in healthy volunteers  
429 nor in clinical populations. The fact that subjects in our task have extensive prior experience before being  
430 told its structure may also help them understand or remember this information when it is provided.  
431 Furthermore, in our task, actions and states were differentiated by location rather than identity of visual  
432 stimuli, and these locations were fixed across trials rather than randomized as in the original two-step task.  
433 This allows model-free RL operating over spatial-motor representations, as has been demonstrated by  
434 others<sup>53</sup>, to contribute more meaningfully to choice. Fixed spatial-motor contingencies also permit of use of  
435 action-outcome, rather than stimulus-outcome, mappings for model-based control, with the former thought

436 to preferentially recruit the anterior cingulate cortex, rather than the OFC<sup>54,55</sup>. They may also underpin our  
437 observation of reaction-time differences following common and rare transitions, even when choices were  
438 model-free, that is consistent with a recent report that motor actions are distinct according to state  
439 transitions, even when choice is model-free<sup>56</sup>. Finally, unlike the original two-step task, where model-based  
440 and model-free RL achieved similar reward rates<sup>42,43</sup>, here use of model-based RL positively correlated  
441 with reward rate, generating a desirable trade-off between performance and cognitive effort that may  
442 influence arbitration between strategies<sup>43</sup>.

443 In addition to increasing model-based control, debriefing had unexpected effects on model-free value  
444 updates, increasing the influence of second-step state values relative to trial outcomes on model-free first-  
445 step action values. This effect was robust and replicated in both clinical groups and healthy volunteers. We  
446 hypothesized that this was mediated by effects of debriefing to modify internal representations of the task  
447 state-space. Knowledge that the reward probability depended on the second-step state that was reached  
448 likely made internal representation of these states more salient and differentiated, and hence better able to  
449 accrue value, and thus driving model-free learning at the first step. Consistent with our hypothesis, subjects  
450 who became more strongly model-based following debriefing - indicating that they had acquired a correct  
451 model of the task, showed larger changes in model-free value updates. This result emphasizes that model-  
452 free RL operates over an internal representation of the states of the external world that must be learnt from  
453 sometimes ambiguous experience and is malleable in the face of new information<sup>57</sup>. A second unexpected  
454 effect of debriefing was an increased tendency to repeat choices, as indexed by the RL model's  
455 perseveration parameter. We hypothesized that this effect was mediated by explicit knowledge that the  
456 reward probabilities changed only occasionally. Consistent with this hypothesis, post-debriefing increases  
457 in perseveration correlated with decreases in perseveration over the course of each block. It thus seems  
458 that, after debriefing, subjects inferred the occurrence of a reward probability reversal, and expected  
459 stability in the trials immediately following. These two unexpected findings show that the 'model' of a task  
460 that may be acquired through explicit information comprises not just the action-state contingencies that are  
461 required for model-based RL, but also beliefs about which distinct states of the environment are relevant  
462 for behaviour, and how the world may change over time, both of which can influence 'model-free' value  
463 learning. It is also important to note that the most significant difference between clinical populations and  
464 healthy volunteers following debriefing was that, while the latter became more perseverative in their  
465 choices, this effect was smaller in OCD, absent in individuals with other mood and anxiety disorders, and  
466 did not correlate in either patient population with changes in perseveration from early to late in post-  
467 debriefing blocks. This evidence that inference based updating was impaired in OCD and other psychiatric  
468 diagnoses is particularly interesting given that the orbitofrontal cortex, which is consistently dysfunctional  
469 in OCD patients<sup>58-60</sup>, is thought to build cognitive maps needed to infer task states that are not directly  
470 observable from sensory input<sup>61</sup>.

471 We should note a number of limitations and directions for future studies. First, as well as standard blocks,  
472 in which transition probabilities were asymmetric, the task included neutral blocks with equal reward  
473 probabilities on the left and right sides. For comparison with the original two-step task, it would be interesting  
474 to assess the influence of the latter on the dominance of model-free control in the uninstructed case.  
475 Equally, it would be worth looking parametrically at the effect of instructions as a function of the amount of  
476 uninstructed experience in our task. Second, since prior work has identified that symptom dimensions can  
477 be a better predictor of behavioural phenotypes than clinical diagnoses, applying our task with dimensional  
478 methods in large online samples could provide further insight into clinical differences in learning and  
479 instruction effects<sup>48</sup>. Finally, although we know of no study showing a positive correlation between years of  
480 education and use of model-based or model-free control, the small but significant difference in terms of  
481 education between healthy volunteers and individuals with the mood and anxiety disorders might limit the  
482 comparisons between these samples. We did observe substantial heterogeneity across subjects in  
483 uninstructed behaviour, and it is likely that increased variability is an inherent feature of uninstructed tasks  
484 that may complicate assessing group differences.

485 In summary, we developed a new sequential decision task which dissociates the effects of uninstructed  
486 experience and explicit information on RL strategy. We found that model-free RL dominates initial  
487 behaviour and maintains a strong influence throughout uninstructed learning, with model-based RL  
488 emerging only in a subset of individuals prior to receiving task structure information, and to a lesser extent  
489 in individuals with OCD. Receiving such information strongly increased model-based control, both in healthy

490 individuals and those with OCD and other mood and anxiety diagnoses. Use of this new task to dissociate  
491 effects of implicit and explicit information on RL strategy thus offers further insight into the content of  
492 learning and the imbalance between RL systems in neuropsychiatric disorders.

493

494

495

496

497

498

499

500

501

502

503

504

505

506

507

508

509

510

511

512

513

514

515

516

517

518

519

520

521

522

523

524

525

526

527

## 528 **Methods**

### 529 **Participants and Testing Procedures**

531 The research protocol was conducted in accordance with the declaration of Helsinki for human studies of  
532 the World Medical Association and approved by the Ethics Committees of the Champalimaud Centre for  
533 the Unknown, NOVA Medical School and Centro Hospitalar Psiquiátrico de Lisboa (CHPL), and the  
534 Institutional Review Board of the New York State Psychiatric Institute (NYSPI). Written informed consent  
535 was obtained from all participants. Clinical samples were recruited at the Champalimaud Clinical Centre  
536 (CCC), CHPL and the NYSPI. In each of these centres, individuals with OCD were recruited from clinical  
537 or research databases. A mood and anxiety disorder control group was recruited randomly from patient  
538 lists (CCC and CHPL), or sequentially (NYSPI), among individuals with the following diagnoses: major  
539 depressive episode or disorder, dysthymia, bipolar disorder, generalized anxiety disorder, post-traumatic  
540 stress disorder, panic disorder or social anxiety disorder. Healthy controls were recruited sequentially as a  
541 convenience sample of community-dwelling participants and tested at the same locations.

542 Following consent, each participant was screened for the presence of exclusion criteria using a clinical  
543 questionnaire assessing history of: acute medical illness; active neurological illness; clinically significant  
544 focal structural lesion of the central nervous system; history of chronic psychosis, dementia, developmental  
545 disorders with low intelligence quotient or any other form of cognitive impairment and illiteracy. Active  
546 psychiatric illness, including substance abuse or dependence, was also an exclusion criterion, with the  
547 exception of the diagnoses defining inclusion in the OCD and the mood and anxiety groups. In the absence  
548 of exclusion criteria, each participant then performed the simplified two-step task (see below).

549 Participants also performed a battery of structured interviews, scales and self-report inventories, including  
550 the MINI Neuropsychiatric Interview<sup>62</sup>, the Structured Clinical Interview for the DSM-IV<sup>63</sup>, the Yale-Brown  
551 Obsessive-Compulsive Scale (Y-BOCS)<sup>64,65</sup> and the State-Trait Anxiety Inventory (STAI)<sup>66</sup>. As the groups  
552 recruited in Lisbon were assessed using the Y-BOCS-II while the groups recruited in New York were  
553 assessed using the original Y-BOCS, we converted the Y-BOCS-II score into original Y-BOCS score by  
554 transforming each item which was scored as 6 into a score of 5<sup>65,67</sup>. In the groups recruited in Lisbon, the  
555 Beck Depression Inventory-II (BDI-II)<sup>68</sup> was also applied to assess depressive symptoms, the Corsi block-  
556 tapping task to assess working memory<sup>69</sup> and a Go/No-Go task to assess impulsivity<sup>70</sup>, while in New York,  
557 the Depression Anxiety Stress Scales (DASS)<sup>71</sup> were applied to assess symptoms of depression, anxiety  
558 and stress. Group differences in sociodemographic and psychometric measures were tested using one-  
559 way ANOVA for continuous variables (with Tukey's HSD for multiple comparisons) and Pearson's chi-  
560 squared for categorical variables. Correlations between neuropsychological test measures (Corsi; Go/No-  
561 GO) and the simplified two-step task measures were performed using Pearson's product moment  
562 correlation coefficient.

### 563 **Simplified two-step task**

565 The simplified two-step task was implemented in MATLAB R2014b using Psychtoolbox (Mathworks, Inc.,  
566 Natick, Massachusetts, USA). The task consisted of a self-paced computer interface with 4 circles always  
567 visible on the screen: 2 central circles (upper and lower) flanked by two side circles (left and right) (Figure  
568 1). Each circle was coloured yellow when available for selection, and black when unavailable, and could be  
569 selected by pressing the corresponding arrow key (up, down, left or right) on the computer keyboard. Each  
570 trial started with both of the central circles turning yellow, prompting a choice between the two (Figure 1a).  
571 This first step choice then activated one of the side circles in a probabilistic fashion, according to a structure  
572 of transition probabilities described below (Figure 1b). The active side circle could be selected with the  
573 corresponding arrow key, resulting either in reward (indicated by the circle changing to the image of a coin)  
574 or no reward (indicated by the circle changing to black). The reward probabilities on the right and left side  
575 changed in blocks that were either neutral ( $p=0.4$  on each side) or non-neutral ( $p=0.8$  on one side and  
576  $p=0.2$  on the other; Figure 1c). Changes from non-neutral blocks were triggered based on each subject's  
577 behaviour, occurring 20 trials after an exponential moving average ( $\tau = 8$  trials) crossed a 75% correct  
578 threshold. In half of the cases this led to the other non-neutral block (reward probability reversals), and the  
579 other half to a neutral block. Changes from neutral blocks occurred with 10% probability on each trial after

580 the 40<sup>th</sup> trial of that block, and always led to the non-neutral block that did not precede that neutral block.  
581 All participants performed 1200 trials on the same day, divided in 4 sessions of 300 trials each.

582

583 We ran two variants of the task which differed with respect to whether the transition probabilities linking the  
584 first-step actions to the second step states were fixed or underwent reversals. In both cases these  
585 probabilities were defined such that choosing one of the central circles (e.g. high) would cause one of the  
586 side circles (e.g. left) to turn yellow with high probability ( $p=0.8$  – common transition), while causing the  
587 other side circle to turn yellow only in a minority of trials, i.e., with low probability ( $p=0.2$  – rare transition).  
588 Choosing the other central circle would lead to common and rare transitions to the opposite sides. In the  
589 Fixed task, the transition probabilities were fixed for each individual throughout the entire task (e.g.,  
590 common transitions for high-left and low-right, and rare transitions for high-right and low-left). In the  
591 Changing task, the transition probabilities underwent reversals on 50% of reward probability block changes  
592 after non-neutral blocks, such that the common transition became rare and vice versa (Figure 1b). In an  
593 initial group of healthy volunteers recruited in Lisbon, subjects were randomized between the two versions  
594 of the task. In all clinical samples as well as healthy volunteers from New York, however, only the Fixed  
595 task was used.

596

597 Prior to starting the task, subjects were given minimal information about task structure. They were only told  
598 that arrow keys could be used to interact with the screen, and that the image of a coin signalled accrual of  
599 a monetary reward. To test how providing explicit information about the task structure affected behaviour,  
600 debriefing was provided between the 3rd and the 4th sessions in some participants, with the 4th session of  
601 the task performed immediately after debriefing. Among healthy volunteers recruited in Lisbon and  
602 randomized between the two versions of the task, debriefing was performed in 17 participants performing  
603 the Fixed version and in 16 participants performing the Changing version of the task. In all other samples,  
604 debriefing was performed for everyone. Please see supplementary material for the specific information  
605 provided to subjects prior to the task and during debriefing.

606

#### 607 Data analysis

608 Data analysis was performed using Python (Python Software Foundation, <http://python.org>) and SPSS  
609 (Version 21.0, SPSS Inc., Chicago, IL, USA), and centred on three main analyses of behaviour on the task:  
610 reversal analysis, logistic regression analyses of stay probability, and RL model comparison and fitting. The  
611 reversal analysis assessed overall task performance according to the average first step choice trajectory  
612 around reward probability reversals between non-neutral blocks, from which we extracted two measures.  
613 One was the fraction of correct choices at the end of the block before the reversal, with correct defined as  
614 the first step choice with a common transition to the side (i.e., state), with highest reward probability. The  
615 second measure was the time constant of adaptation to the reversal, estimated by a least squares  
616 exponential fit to the cross subject mean choice trajectory following the reversal. For the Changing version  
617 of the task, reversal analysis was performed according to the average trajectory for reversals in both  
618 transition and reward probabilities. Importantly, while reversal analyses provide information about how well  
619 subjects are able to track which option is correct, they do not differentiate between use of model-free and  
620 model-based strategies.

621

622 The first analysis used to assess model-free vs. model-based behavioural strategies was an analysis of  
623 ‘stay-probability’<sup>11,16,25,26,17–24</sup>, defined as the probability of repeating the first-step choice on any given trial  
624 as a function of the outcome (rewarded or not) and transition (common or rare) on the previous trial. In  
625 addition to plotting raw stay probabilities, we analysed the effect of trial events on the subsequent choice  
626 using a logistic regression model with several binary predictors. The *outcome*, *transition* and *transition-*  
627 *outcome interaction* predictors modelled the influence of the previous trial’s outcome, transition and their  
628 interaction on the probability of repeating the previous first step choice. We additionally included a *bias*  
629 predictor capturing bias towards the upper or lower circle, and a *correct* predictor, which modelled the  
630 influence of whether the previous trials choice was correct (i.e. high reward probability) on the probability  
631 of repeating that choice. The latter prevents spurious loading on the *transition-outcome interaction*



632 predictor, which has been described in two-step tasks with high contrast between good and bad options,  
633 due to correlation between action values at the start of the trial and subsequent trial events<sup>42</sup>.

634

### 635 RL modelling

636 Additional analyses of behavioural strategy were obtained by fitting reinforcement learning models to  
637 observed behaviour. We first detail the model used for the main analyses then a set of alternative models  
638 that were rejected by model-comparison. The model followed those typically used in analysis of the original  
639 two-step task<sup>11</sup> in combining a model-based and a model-free RL component, both with value estimates  
640 contributing to behaviour. The model-free component maintained estimates of the values  $Q^{mf}(a)$  of the  
641 first-step actions (up or down), and  $V(s)$  of the second step states (left and right). These values were  
642 updated as:

$$643 \quad Q_{t+1}^{mf}(a) = (1 - \alpha_Q)Q_t^{mf}(a) + \alpha_Q(\lambda r + (1 - \lambda)V_t(s))$$

$$644 \quad V_{t+1}(s) = (1 - \alpha_Q)V_t(s) + \alpha_Q r$$

645 Where  $r$  is the reward obtained on trial  $t$  (1 or 0),  $\alpha_Q$  is the value learning rate and  $\lambda$  is the eligibility trace  
646 parameter.

647 The model-based component maintained estimates of the transition probabilities linking the first step  
648 actions to the second step states ( $P(s_2|a_1)$ ), updated as:

$$649 \quad P_{t+1}(s|a) = (1 - \alpha_T)P_t(s|a) + \alpha_T$$

$$650 \quad P_{t+1}(s'|a) = (1 - \alpha_T)P_t(s'|a)$$

651 where  $\alpha_T$  is a learning rate for transition probabilities,  $s$  is the second step state reached and  $s'$  the second  
652 step state not reached on trial  $t$ .

653 At the start of each trial, model-based action values were calculated as:

$$654 \quad Q_t^{mb}(a) = \sum_j P(s_j|a)Q_{mf}(s_j)$$

655 Model-free and model-based action values were combined with perseveration and bias to given net action  
656 values, calculated as:

$$657 \quad Q_t^{net}(a_i) = G_{mf}Q_t^{mf}(a_i) + G_{mb}Q_t^{mb}(a) + bB_i + pP_i$$

658 Where  $G_{mf}$  and  $G_{mb}$  are parameters controlling, respectively, the strength of influence of model-free and  
659 model-based action values on choice,  $b$  is a parameter controlling the strength of choice bias,  $B_i$  is a  
660 variable which takes a value of 1 for the high action and zero for the low action,  $p$  is a parameter controlling  
661 the strength of choice perseveration,  $P_i$  is a variable which takes a value of 1 if action  $a_i$  was chosen on the  
662 previous trial and 0 if it was not.

663 The model's probability of choosing action  $a_i$  was given by  $P(a_i) = \frac{e^{Q_t^{net}(a_i)}}{\sum_j e^{Q_t^{net}(a_j)}}$ .

664 For model comparison, several reduced variants were considered. For the *Model-free only* variant the  
665 model-based component was removed such that the net action values were:

$$666 \quad Q_t^{net}(a_i) = G_{mf}Q_t^{mf}(a_i) + bB_i + pP_i.$$

667 For the *Model-based only* variant the model-free component was removed such that the net action values  
668 were:

$$669 \quad Q_t^{net}(a_i) = G_{mb}Q_t^{mb}(s_1, a_i) + bB_i + pP_i.$$

670 For the *No bias* variant the bias strength variable  $b$  was set to zero. For the *No perseveration* variant the  
671 perseveration strength variable  $p$  was set to zero.

672 Hierarchical modelling:

673 Fits of both the logistic regression model and reinforcement learning models to populations of subjects used  
674 a Bayesian hierarchical modelling framework <sup>72</sup>, in which parameter vectors  $\mathbf{h}_i$  for individual sessions were  
675 assumed to be drawn from Gaussian distributions at the population level with means and variance  $\boldsymbol{\theta} =$   
676  $\{\boldsymbol{\mu}, \boldsymbol{\Sigma}\}$ . The population level prior distributions were fit to their maximum likelihood estimate:

$$677 \boldsymbol{\theta}^{ML} = \operatorname{argmax}_{\boldsymbol{\theta}} \{p(D|\boldsymbol{\theta})\} = \operatorname{argmax}_{\boldsymbol{\theta}} \left\{ \prod_i^N \int d\mathbf{h}_i p(D_i|\mathbf{h}_i) p(\mathbf{h}_i|\boldsymbol{\theta}) \right\}$$

678 Optimization was performed using the Expectation-Maximization algorithm with a Laplace approximation  
679 for the E-step at the k-th iteration given by:

$$680 p(\mathbf{h}_i^k | D_i) = N(\mathbf{m}_i^k, \mathbf{V}_i^k)$$

$$681 \mathbf{m}_i^k = \operatorname{argmax}_{\mathbf{h}} \{p(D_i|\mathbf{h})p(\mathbf{h}|\boldsymbol{\theta}^{k-1})\}$$

682 Where  $N(\mathbf{m}_i^k, \mathbf{V}_i^k)$  is a normal distribution with mean  $\mathbf{m}_i^k$  given by the maximum a posteriori value of the  
683 session parameter vector  $\mathbf{h}_i$  given the population level means and variance  $\boldsymbol{\theta}^{k-1}$ , and the covariance  $\mathbf{V}_i^k$   
684 given by the inverse Hessian of the likelihood around  $\mathbf{m}_i^k$ . For simplicity we assumed that the population  
685 level covariance  $\boldsymbol{\Sigma}$  had zero off-diagonal terms. For the k-th M-step of the EM algorithm the population  
686 level prior distribution parameters  $\boldsymbol{\theta} = \{\boldsymbol{\mu}, \boldsymbol{\Sigma}\}$  are updated as:

$$687 \boldsymbol{\mu}^k = \frac{1}{N} \sum_{i=1}^N \mathbf{m}_i^k$$

$$688 \boldsymbol{\Sigma} = \frac{1}{N} \sum_{i=1}^N [(\mathbf{m}_i^k)^2 + \mathbf{V}_i^k] - (\boldsymbol{\mu}^k)^2$$

689 Parameters were transformed before inference to enforce constraints:

$$690 0 < \{G_{mf}, G_{mb}\}$$

$$691 0 < \{\alpha_Q, \alpha_T, \lambda\} < 1$$

692 95% confidence intervals on population means  $\boldsymbol{\mu}$  were calculated as  $c_i = \pm 1.96\sqrt{-1/H_i}$  where  $c_i$  is the  
693 confidence interval for parameter  $i$  and  $H_i$  is the  $i$ -th diagonal element of the Hessian at  $\boldsymbol{\theta}^{ML}$  with respect  
694 to  $\boldsymbol{\mu}$ .

695

696 Model comparison:

697 To compare the goodness of fit for hierarchical models with different numbers of parameters we used the  
698 integrated Bayes Information Criterion (iBIC) score. The iBIC score is related to the model log likelihood  
699  $p(D|M)$  as:

$$700 \log p(D|M) = \int d\boldsymbol{\theta} p(D|\boldsymbol{\theta})p(\boldsymbol{\theta}|M)$$

$$701 \approx -\frac{1}{2} iBIC = \log p(D|\boldsymbol{\theta}^{ML}) - \frac{1}{2} |M| \log |D|$$

702 Where  $|M|$  is the number of fitted parameters of the prior,  $|D|$  is the number of data points (total choices  
703 made by all subjects) and iBIC is the integrated BIC score. The log data likelihood given maximum likelihood  
704 parameters for the prior  $\log p(D|\boldsymbol{\theta}^{ML})$  is calculated by integrating out the individual session parameters:

$$705 \log p(D|\boldsymbol{\theta}^{ML}) = \sum_i^N \log \int d\mathbf{h} p(D_i|\mathbf{h})p(\mathbf{h}|\boldsymbol{\theta}^{ML})$$

706 
$$\approx \sum_i^N \log \frac{1}{K} \sum_{j=1}^K p(D_i | \mathbf{h}^j)$$

707 Where the integral is approximated as the average over K samples drawn from the prior  $p(\mathbf{h} | \boldsymbol{\theta}^{ML})$ .

708

709 Permutation testing:

710 Permutation testing was used to assess the statistical significance of learning and instruction effects on RL  
711 and logistic regression model fits, and the reversal analysis. To assess the effects of experience in the task  
712 we compared behavior between sessions 1 and 3, while to assess the effects of explicit knowledge we  
713 compared behavior between sessions 3 and 4 in the groups that did and did not receive instruction between  
714 these sessions.

715 To test for a significant difference in behavioral parameter  $x$  between conditions (e.g. session 1 vs 3), we  
716 evaluated the population mean value of the parameter for each conditions and calculated the difference  
717  $\Delta x_{true}$  between them. We then constructed an ensemble of 5000 permuted datasets in which the  
718 assignments of sessions to the two conditions was randomised. Randomisation was performed within  
719 subject, such that the number of sessions from each subject in each condition was preserved. For each  
720 permuted dataset we re-ran the analysis and evaluated the difference in parameter  $x$  between the two  
721 conditions, to give a distribution of  $\Delta x_{perm}$ , which in the limit of many permutations is the distribution of  $\Delta x$   
722 under the null hypothesis that there is no difference between the conditions. The two tailed P value for the  
723 observed difference is given by:

724 
$$P = 2 \min \left( \frac{M}{N}, 1 - \frac{M}{N} \right)$$

725 Where N is the number of permutations and M is the number of permutations for which  $\Delta x_{perm} > \Delta x_{true}$ .

726 To assess significant differences in learning or debriefing effects between clinical groups and healthy  
727 controls, and for differences in the healthy controls between groups who did and did not receive debriefing,  
728 we tested for a significant interaction between session number and group. The significance of the  
729 interaction was assessed using a permutation test in which we evaluated the difference  $\Delta g_{true} = \Delta x_{i,j}^A -$   
730  $\Delta x_{i,j}^B$  where  $\Delta x_{i,j}^A$  is the difference in behavioural parameter  $x$  between sessions  $i$  and  $j$  in group A, and  $\Delta x_{i,j}^B$   
731 is the difference in behavioural parameter  $x$  between sessions  $i$  and  $j$  in group B. We then constructed an  
732 ensemble of 5000 permuted datasets by randomly permuting subjects between groups while preserving  
733 the total number of subjects in each group. We assessed  $\Delta g_{perm} = \Delta x_{i,j}^A - \Delta x_{i,j}^B$  for each permuted dataset  
734 and calculated P values for the interaction as above.

735 **References**

- 736 1. Dickinson, A. Actions and Habits: The Development of Behavioural Autonomy. *Philos. Trans. R.*  
737 *Soc. B Biol. Sci.* **308**, 67–78 (1985).
- 738 2. Sloman, S. A. The empirical case for two systems of reasoning. *Psychol. Bull.* **119**, 3–22 (1996).
- 739 3. Kahneman, D. A perspective on judgment and choice: Mapping bounded rationality. *Behav. Sci.*  
740 **58**, 697–720 (2003).
- 741 4. Daw, N. D., Niv, Y. & Dayan, P. Uncertainty-based competition between prefrontal and  
742 dorsolateral striatal systems for behavioral control. *Nat. Neurosci.* **8**, 1704–11 (2005).
- 743 5. Dolan, R. J. & Dayan, P. Goals and habits in the brain. *Neuron* **80**, 312–325 (2013).
- 744 6. Robbins, T. W. & Costa, R. M. Habits. *Curr. Biol.* **27**, R1200–R1206 (2017).
- 745 7. Adams, C. D. & Dickinson, A. Instrumental responding following reinforcer devaluation. *Q. J. Exp.*  
746 *Psychol. Sect. B Comp. Physiol. Psychol.* **33**, 109–121 (1981).
- 747 8. Adams, C. D. Variations in the sensitivity of instrumental responding to reinforcer devaluation. *Q.*  
748 *J. Exp. Psychol. Sect. B* **34**, 77–98 (1982).
- 749 9. Colwill, R. M. & Rescorla, R. A. Postconditioning Devaluation of a Reinforcer Affects Instrumental  
750 Responding. *J. Exp. Psychol. Anim. Behav. Process.* **11**, 120–132 (1985).
- 751 10. Sutton, R. S. & Barto, A. G. Introduction to Reinforcement Learning. **4**, (1998).
- 752 11. Daw, N. D., Gershman, S. J., Seymour, B., Dayan, P. & Dolan, R. J. Model-based influences on  
753 humans' choices and striatal prediction errors. *Neuron* **69**, 1204–1215 (2011).
- 754 12. Wan Lee, S., Shimojo, S. & O'Doherty, J. P. Neural Computations Underlying Arbitration between  
755 Model-Based and Model-free Learning. *Neuron* **81**, 687–699 (2014).
- 756 13. Gershman, S. J., Horvitz, E. J. & Tenenbaum, J. B. Computational rationality: A converging  
757 paradigm for intelligence in brains, minds, and machines. *Science* **349**, 273–278 (2015).
- 758 14. Gläscher, J., Daw, N., Dayan, P. & O'Doherty, J. P. States versus rewards: Dissociable neural  
759 prediction error signals underlying model-based and model-free reinforcement learning. *Neuron*  
760 **66**, 585–595 (2010).
- 761 15. Wunderlich, K., Dayan, P. & Dolan, R. J. Mapping value based planning and extensively trained  
762 choice in the human brain. *Nat. Neurosci.* **15**, 786–791 (2012).
- 763 16. Otto, A. R., Raio, C. M., Chiang, A., Phelps, E. A. & Daw, N. D. Working-memory capacity protects  
764 model-based learning from stress. *Proc. Natl. Acad. Sci.* **110**, 20941–20946 (2013).
- 765 17. Otto, A. R., Gershman, S. J., Markman, A. B. & Daw, N. D. The Curse of Planning: Dissecting  
766 Multiple Reinforcement-Learning Systems by Taxing the Central Executive. *Psychol. Sci.* **24**, 751–  
767 761 (2013).
- 768 18. Skatova, A., Chan, P. A. & Daw, N. D. Extraversion differentiates between model-based and  
769 model-free strategies in a reinforcement learning task. *Front. Hum. Neurosci.* **7**, (2013).
- 770 19. Eppinger, B., Walter, M., Heekeren, H. R. & Li, S. C. Of goals and habits: Age-related and  
771 individual differences in goal-directed decision-making. *Front. Neurosci.* (2013).  
772 doi:10.3389/fnins.2013.00253
- 773 20. Smittenaar, P., FitzGerald, T. H. B., Romei, V., Wright, N. D. & Dolan, R. J. Disruption of  
774 Dorsolateral Prefrontal Cortex Decreases Model-Based in Favor of Model-free Control in Humans.  
775 *Neuron* **80**, 914–919 (2013).
- 776 21. Schad, D. J. *et al.* Processing speed enhances model-based over model-free reinforcement  
777 learning in the presence of high working memory functioning. *Front. Psychol.* **5**, (2014).
- 778 22. Radenbach, C. *et al.* The interaction of acute and chronic stress impairs model-based behavioral

- 779 control. *Psychoneuroendocrinology* **53**, 268–280 (2015).
- 780 23. Deserno, L. *et al.* Ventral striatal dopamine reflects behavioral and neural signatures of model-  
781 based control during sequential decision making. *Proc. Natl. Acad. Sci.* **112**, 1595–1600 (2015).
- 782 24. Economides, M., Kurth-Nelson, Z., Lübbert, A., Guitart-Masip, M. & Dolan, R. J. Model-Based  
783 Reasoning in Humans Becomes Automatic with Training. *PLoS Comput. Biol.* **11**, (2015).
- 784 25. Worbe, Y. *et al.* Valence-dependent influence of serotonin depletion on model-based choice  
785 strategy. *Mol. Psychiatry* **21**, 624–629 (2016).
- 786 26. Friedel, E. *et al.* Devaluation and sequential decisions: linking goal-directed and model-based  
787 behavior. *Front. Hum. Neurosci.* **8**, (2014).
- 788 27. Sebold, M. *et al.* Model-based and model-free decisions in alcohol dependence.  
789 *Neuropsychobiology* **70**, 122–131 (2014).
- 790 28. Voon, V. *et al.* Disorders of compulsivity: a common bias towards learning habits. *Mol. Psychiatry*  
791 **20**, 345–352 (2015).
- 792 29. Voon, V. *et al.* Motivation and value influences in the relative balance of goal-directed and habitual  
793 behaviours in obsessive-compulsive disorder. *Transl. Psychiatry* **5**, e670 (2015).
- 794 30. Gillan, C. M., Kosinski, M., Whelan, R., Phelps, E. A. & Daw, N. D. Characterizing a psychiatric  
795 symptom dimension related to deficits in goal-directed control. *Elife* **5**, (2016).
- 796 31. Culbreth, A. J., Westbrook, A., Daw, N. D., Botvinick, M. & Barch, D. M. Reduced model-based  
797 decision-making in schizophrenia. *J. Abnorm. Psychol.* **125**, 777–787 (2016).
- 798 32. da Silva, C. F. & Hare, T. Humans primarily use model-based inference in the two-stage task. *Nat.*  
799 *Hum. Behav.* 1–14 (2020).
- 800 33. Kaufman, Arnold; Baron, Alan; and Kopp, R. E. Some Effects of Instructions on Human Operant  
801 Behavior. *Psychon. Monogr. Suppl.* **1**, 243–50 (1966).
- 802 34. Baron, A., Kaufman, A. & Stauber, K. A. Effects of instructions and reinforcement-feedback on  
803 human operant behavior maintained by fixed-interval reinforcement1. *J. Exp. Anal. Behav.* (1969).  
804 doi:10.1901/jeab.1969.12-701
- 805 35. Baron, A. & Galizio, M. Instructional control of human operant behavior. *Psychol. Rec.* (1983).
- 806 36. Wilson, G. D. Reversal of Differential GSR Conditioning by Instructions. *J. Exp. Psychol.* **76**, 491–  
807 93 (1968).
- 808 37. Atlas, L. Y., Doll, B. B., Li, J., Daw, N. D. & Phelps, E. A. Instructed knowledge shapes feedback-  
809 driven aversive learning in striatum and orbitofrontal cortex, but not the amygdala. *Elife* (2016).  
810 doi:10.7554/elifelife.15192
- 811 38. Doll, B. B., Jacobs, W. J., Sanfey, A. G. & Frank, M. J. Instructional control of reinforcement  
812 learning: A behavioral and neurocomputational investigation. *Brain Res.* **1299**, 74–94 (2009).
- 813 39. Biele, G., Rieskamp, J. & Gonzalez, R. Computational models for the combination of advice and  
814 individual learning. *Cogn. Sci.* (2009). doi:10.1111/j.1551-6709.2009.01010.x
- 815 40. Li, J., Delgado, M. R. & Phelps, E. A. How instructed knowledge modulates the neural systems of  
816 reward learning. *Proc. Natl. Acad. Sci.* (2011). doi:10.1073/pnas.1014938108
- 817 41. Hertwig, R. & Erev, I. The description-experience gap in risky choice. *Trends in Cognitive*  
818 *Sciences* (2009). doi:10.1016/j.tics.2009.09.004
- 819 42. Akam, T., Costa, R. & Dayan, P. Simple Plans or Sophisticated Habits? State, Transition and  
820 Learning Interactions in the Two-Step Task. *PLoS Comput. Biol.* **11**, (2015).
- 821 43. Kool, W., Cushman, F. A. & Gershman, S. J. When Does Model-Based Control Pay Off? *PLoS*  
822 *Comput. Biol.* **12**, (2016).



- 823 44. Balleine, B. W. & Dickinson, A. Goal-directed instrumental action: Contingency and incentive  
824 learning and their cortical substrates. in *Neuropharmacology* **37**, 407–419 (1998).
- 825 45. Bostan, A. C. & Strick, P. L. The basal ganglia and the cerebellum: nodes in an integrated  
826 network. *Nature Reviews Neuroscience* 1–13 (2018). doi:10.1038/s41583-018-0002-7
- 827 46. Thorndike, E. L. Animal intelligence: An experimental study of the associative processes in  
828 animals. *Psychol. Rev.* **2**, 1–107 (1898).
- 829 47. Biele, G., Rieskamp, J., Krugel, L. K. & Heekeren, H. R. The Neural basis of following advice.  
830 *PLoS Biol.* (2011). doi:10.1371/journal.pbio.1001089
- 831 48. Gillan, C. M. *et al.* Comparison of the Association between Goal-Directed Planning and Self-  
832 reported Compulsivity vs Obsessive-Compulsive Disorder Diagnosis. *JAMA Psychiatry* (2020).  
833 doi:10.1001/jamapsychiatry.2019.2998
- 834 49. Hirschtritt, M. E., Bloch, M. H. & Mathews, C. A. Obsessive-compulsive disorder advances in  
835 diagnosis and treatment. *JAMA - Journal of the American Medical Association* (2017).  
836 doi:10.1001/jama.2017.2200
- 837 50. Graybiel, A. M. & Rauch, S. L. Toward a neurobiology of obsessive-compulsive disorder. *Neuron*  
838 **28**, 343–347 (2000).
- 839 51. Gillan, C. M. *et al.* Disruption in the balance between goal-directed behavior and habit learning in  
840 obsessive-compulsive disorder. *Am. J. Psychiatry* **168**, 718–726 (2011).
- 841 52. Wheaton, M. G., Gillan, C. M. & Simpson, H. B. Does cognitive-behavioral therapy affect goal-  
842 directed planning in obsessive-compulsive disorder? *Psychiatry Res.* (2019).  
843 doi:10.1016/j.psychres.2018.12.079
- 844 53. Shahar, N. *et al.* Credit assignment to state-independent task representations and its relationship  
845 with model-based decision making. *Proc. Natl. Acad. Sci.* (2019). doi:10.1073/pnas.1821647116
- 846 54. Rushworth, M. F. S., Behrens, T. E. J., Rudebeck, P. H. & Walton, M. E. Contrasting roles for  
847 cingulate and orbitofrontal cortex in decisions and social behaviour. *Trends in Cognitive Sciences*  
848 (2007). doi:10.1016/j.tics.2007.01.004
- 849 55. Akam, T. *et al.* Anterior cingulate cortex represents action-state predictions and causally mediates  
850 model-based reinforcement learning in a two-step decision task. *bioRxiv* 126292 (2020).  
851 doi:10.1101/126292
- 852 56. Konovalov, Arkady; Krajbich, I. Mouse tracking reveals structure knowledge in the absence of  
853 model-based choice. *Nat. Commun.* **11**, (2020).
- 854 57. Gershman, S. J. & Uchida, N. Believing in dopamine. *Nat. Rev. Neurosci.* (2019).  
855 doi:10.1038/s41583-019-0220-7
- 856 58. Baxter Jr., L. R. *et al.* Local cerebral glucose metabolic rates in obsessive-compulsive disorder. A  
857 comparison with rates in unipolar depression and in normal controls. *Arch Gen Psychiatry* **44**,  
858 211–218 (1987).
- 859 59. Menzies, L. *et al.* Integrating evidence from neuroimaging and neuropsychological studies of  
860 obsessive-compulsive disorder: The orbitofronto-striatal model revisited. *Neuroscience and*  
861 *Biobehavioral Reviews* **32**, 525–549 (2008).
- 862 60. Chamberlain, S. R. *et al.* Orbitofrontal dysfunction in patients with obsessive-compulsive disorder  
863 and their unaffected relatives. *Science (80-. )*. (2008). doi:10.1126/science.1154433
- 864 61. Schuck, N. W., Cai, M. B., Wilson, R. C. & Niv, Y. Human Orbitofrontal Cortex Represents a  
865 Cognitive Map of State Space. *Neuron* (2016). doi:10.1016/j.neuron.2016.08.019
- 866 62. Sheehan, D. V. *et al.* The validity of the Mini International Neuropsychiatric Interview (MINI)  
867 according to the SCID-P and its reliability. *Eur. Psychiatry* **12**, 232–241 (1997).
- 868 63. First, M. B., Spitzer, R. L., Gibbon, M. & Williams, J. B. W. Structured Clinical Interview for DSM-IV

- 869 Axis I Disorders. *New York State Psychiatric Institute* (2002).
- 870 64. Goodman, W. K. *et al.* The Yale-Brown Obsessive Compulsive Scale: I. Development, Use, and  
871 Reliability. *Arch. Gen. Psychiatry* **46**, 1006–1011 (1989).
- 872 65. Storch, E. A. *et al.* Development and psychometric evaluation of the yale-brown obsessive-  
873 compulsive scale-second edition. *Psychol. Assess.* **22**, 223–232 (2010).
- 874 66. Spielberger, C. Manual for the State-Trait Anxiety Inventory (STAI). *Consult. Psychol. Press* 4–26  
875 (1983).
- 876 67. Castro-Rodrigues, P. *et al.* Criterion validity of the Yale-Brown Obsessive-Compulsive Scale  
877 Second Edition for diagnosis of obsessive-compulsive disorder in adults. *Front. Psychiatry* (2018).  
878 doi:10.3389/fpsy.2018.00397
- 879 68. Beck, A. T., Steer, R. A. & Brown, G. K. Manual for the Beck depression inventory-II. *San Antonio,*  
880 *TX Psychol. Corp.* 1–82 (1996).
- 881 69. Berch, D. B., Krikorian, R. & Huha, E. M. The Corsi block-tapping task: methodological and  
882 theoretical considerations. *Brain Cogn.* **38**, 317–38 (1998).
- 883 70. Mueller, S. T. & Piper, B. J. The Psychology Experiment Building Language (PEBL) and PEBL  
884 Test Battery. *J. Neurosci. Methods* **222**, 250–259 (2014).
- 885 71. Lovibond, S. H. & Lovibond, P. F. *Manual for the Depression Anxiety Stress Scales.* *Psychology*  
886 *Foundation of Australia* (1995). doi:DOI: 10.1016/0005-7967(94)00075-U
- 887 72. Huys, Q. J. M. *et al.* Disentangling the roles of approach, activation and valence in instrumental  
888 and pavlovian responding. *PLoS Comput. Biol.* **7**, (2011).

889  
890  
891  
892  
893  
894  
895  
896  
897  
898  
899  
900  
901  
902  
903  
904  
905  
906  
907  
908

909 **Table 1 – Sociodemographic and psychometric characterization of study samples**

|                                                    | <b>HV</b>  | <b>OCD</b>  | <b>MA</b>   |
|----------------------------------------------------|------------|-------------|-------------|
| Sex (% males)                                      | 33%        | 41%         | 31%         |
| Age (years)                                        | 30.4 (7.1) | 34.1 (12.4) | 32.6 (13.1) |
| Education (years completed)                        | 16.2 (2.5) | 15.1 (2.9)  | 14.5 (4.1)  |
| YBOCS total score                                  | 1.5 (3.5)  | 23 (6.4)    | 2.7 (4.8)   |
| Y-BOCS obsessions                                  | 0.6 (1.8)  | 11 (3.3)    | 2.1 (3.7)   |
| Y-BOCS compulsions                                 | 0.9 (1.9)  | 12 (3.5)    | 0.6 (1.9)   |
| STAI-state score                                   | 31.5 (8.1) | 47.6 (15.4) | 47.9 (11.3) |
| STAI-trait score                                   | 30.8 (8)   | 56.6 (12)   | 53.1 (10.1) |
| BDI-II score <sup>a</sup>                          | 4 (4.8)    | 21.1 (16.2) | 24.8 (12.1) |
| DASS depression score <sup>b</sup>                 | 1.5 (1.8)  | 7.8 (5.6)   | 7.9 (4.4)   |
| DASS anxiety score <sup>b</sup>                    | 0.6 (1.2)  | 5.2 (4.4)   | 5.8 (4.3)   |
| DASS stress score <sup>b</sup>                     | 2.5 (2.2)  | 10.4 (4.7)  | 8.5 (4.5)   |
| Corsi block tapping test - total span <sup>a</sup> | 16 (3.1)   | 15.4 (3.9)  | 13.1 (2.5)  |
| No-Go errors in Go/No-Go task (n)                  | 11.2 (7.4) | 16 (12.5)   | 21.2 (11.6) |
| Reaction time in Go/No-Go task (ms)                | 470 (44.4) | 517 (55.1)  | 510 (55.1)  |

910

911 HV = Healthy volunteers; OCD = Obsessive-compulsive disorder; MA = Mood and anxiety disorders. <sup>a</sup> -  
912 only in Lisbon groups; <sup>b</sup> - only in New York groups; YBOCS-II = Yale-Brown Obsessive-Compulsive  
913 Scale-II; STAI = State-Trait Anxiety Inventory; BDI-II = Beck Depression Inventory; DASS = Depression  
914 Anxiety Stress Scales. Data presented are mean values (standard deviations).

915

916

917

918

919

920

921

922

923

924 **Supplementary results**

925

926 **Changing transition probabilities inhibit model-based control**

927 In 42 healthy volunteers recruited in Lisbon, we tested a version of the task in which transition probabilities  
928 linking the first step actions and second-step states underwent periodic reversals. In this Changing version  
929 of the task (Figure S5), subjects were still able to successfully track which first step action was correct,  
930 choosing the correct option at the end of block well above chance level, (session 1: 0.77, session 3: 0.76;  
931 Figure S5c), and adapting to reversals in reward probabilities with a similar trajectory relative to the Fixed  
932 task (exponential fit tau, session 1: 22.8 trials, session 3: 14.0 trials). Again, neither of these measures of  
933 overall performance changed significantly between sessions 1 and 3 ( $P>0.3$ ).

934 However, unlike in the Fixed task, the stay-probability analysis did not show increased influence of transition  
935 and transition-outcome interaction in session 3 relative to session 1 ( $P=0.2$  for both), consistent with no  
936 changes in the use of model-based RL. On the contrary, there was an increase in the influence of trial  
937 outcome ( $P=0.01$ ), associated with a model-free direct reinforcement strategy<sup>11,42</sup> (Figure 51a,b). Similarly  
938 to the Fixed task, there was a significant correlation between loading on the transition–outcome interaction  
939 parameter and the number of rewards obtained ( $\rho=0.4$ ,  $P<0.01$ ). Model comparison indicated that the  
940 mixture and model-free-only RL models fitted the data much better than the model-based-only model, and  
941 that the difference in BIC scores between the mixture model and model-free-only model was negligible  
942 ( $\Delta\text{BIC} = 3$ ; Figure S5d left panel). Again similarly to the Fixed task, the model including both “bias” and  
943 “perseveration” parameters fits the data better than a model lacking these parameters (Figure S5d, right  
944 panel). For consistency with analysis of the Fixed task, we used the mixture model to look for differences  
945 in behaviour between sessions 1 and 3 but found no significant change in model parameters (Figure S5e).  
946 These data suggest that changes in the action-state transition probabilities prevented most subjects from  
947 learning a model-based strategy.

948 In this version of the task, debriefing did not increase the use of model-based RL among subjects for whom  
949 a likelihood ratio test indicated model-based RL was not being used significantly in session 3 ( $n=36$ ; Figure  
950 S6). The fraction of subjects identified as using a model-based strategy at session 4 was the same in the  
951 debriefing and no-debriefing groups (debriefing group 2/12, no-debriefing group 4/24;  $z = 0$ ,  $P=1$ , z-test for  
952 difference of proportions; Figure S2A, F). Subjects in the debriefing group adapted faster to reversals in  
953 session 4 than session 3 ( $P=0.03$ , Figure S6b), and the logistic regression analysis showed an increased  
954 influence of the trial outcome on subsequent choice in session 4 compared to 3 in the debriefing group  
955 ( $P=0.02$ , Figure S6d), but the session by group interaction did not reach significance in both cases ( $P=0.2$   
956 and  $P=0.06$  respectively). The influence of the transition and transition-outcome interaction parameters on  
957 subsequent choice were unaffected by debriefing ( $P=0.99$  and  $P=0.3$  respectively, Figure S6d) and no  
958 parameters of the RL model differed significantly pre and post-debriefing ( $P>0.19$ , Figure S6e). As  
959 expected, no significant differences were observed in any analyses between sessions 3 and 4 in the no-  
960 debriefing group (Figure S6g-j). These results indicate that in the more complex Changing task, subjects  
961 either did not understand the debriefing or decided the effort of trying to use information about the task  
962 structure was not worthwhile.

963

964 **Supplementary table sT1 - Differences in learning and debriefing effects in healthy volunteers**  
965 **between the Lisbon and New York samples.**

966  
967  
968  
969  
970  
971  
972  
973  
974  
975  
976  
977

| Model parameters                        | Learning effects <sup>a</sup> | Debriefing effects <sup>a</sup> |
|-----------------------------------------|-------------------------------|---------------------------------|
| Model-free strength (MF)                | 0.96                          | 0.92                            |
| Model-based strength (MB)               | 0.26                          | 0.25                            |
| Value learning rate ( $\alpha_Q$ )      | 0.37                          | 0.56                            |
| Eligibility trace ( $\lambda$ )         | 0.2                           | 0.1                             |
| Transition learning rate ( $\alpha_T$ ) | 0.14                          | 0.62                            |
| Choice bias                             | 0.4                           | 0.73                            |
| Choice perseveration                    | 0.69                          | 0.32                            |

978 <sup>a</sup>Permutation tests (5000 permutations) were used to assess differences in the fitted model parameter  
979 loadings between Fixed task Lisbon (n=40) and New York (n=27) samples in the effect of learning (defined  
980 as change between session 1 and 3) and debriefing (defined as change between session 3 and 4, taking  
981 only subjects who are MF at session 3). P-values for interactions between group and the effect of interest  
982 are shown.

983



984 **Supplementary table sT2 - Differences in learning and debriefing effects in individuals with OCD**  
985 **between the Lisbon and New York samples.**

986

987

988

989

990

991

992

993

994

995

996

997

| Model parameters                        | Learning effects <sup>a</sup> | Debriefing effects <sup>a</sup> |
|-----------------------------------------|-------------------------------|---------------------------------|
| Model-free strength (MF)                | 0.38                          | <b>0.04</b>                     |
| Model-based strength (MB)               | 0.1                           | 0.66                            |
| Value learning rate ( $\alpha Q$ )      | 0.88                          | <b>0.04</b>                     |
| Eligibility trace ( $\lambda$ )         | 0.87                          | 0.87                            |
| Transition learning rate ( $\alpha T$ ) | 0.95                          | 0.24                            |
| Choice bias                             | 0.86                          | 0.58                            |
| Choice perseveration                    | 0.17                          | 0.79                            |

998

999 <sup>a</sup>Permutation tests (5000 permutations) were used to assess differences in the fitted model parameter  
1000 loadings between Fixed task Lisbon (n=16) and New York (n=30) samples in the effect of learning (defined  
1001 as change between session 1 and 3) and debriefing (defined as change between session 3 and 4, taking  
1002 only subjects who are MF at session 3). P-values for interactions between group and the effect of interest  
1003 are shown.

1004

1005 **Supplementary table sT3 - Differences in learning and debriefing effects in individuals with other**  
1006 **mood and anxiety disorders between the Lisbon and New York samples.**

| Model parameters                        | Learning effects <sup>a</sup> | Debriefing effects <sup>a</sup> |
|-----------------------------------------|-------------------------------|---------------------------------|
| Model-free strength (MF)                | 0.61                          | 0.52                            |
| Model-based strength (MB)               | 0.99                          | 0.51                            |
| Value learning rate ( $\alpha Q$ )      | 0.64                          | 0.84                            |
| Eligibility trace ( $\lambda$ )         | 0.42                          | 0.66                            |
| Transition learning rate ( $\alpha T$ ) | 0.96                          | 0.58                            |
| Choice bias                             | 0.71                          | 0.71                            |
| Choice perseveration                    | 0.25                          | 0.39                            |

1017  
1018  
1019  
1020 <sup>a</sup>Permutation tests (5000 permutations) were used to assess differences in the fitted model parameter  
1021 loadings between Fixed task Lisbon (n=16) and New York (n=33) samples in the effect of learning (defined  
1022 as change between session 1 and 3) and debriefing (defined as change between session 3 and 4, taking  
1023 only subjects who are MF at session 3). P-values for interactions between group and the effect of interest  
1024 are shown.

1025

First step - left or right presses

Second step - up or down presses

Second step - left or right presses

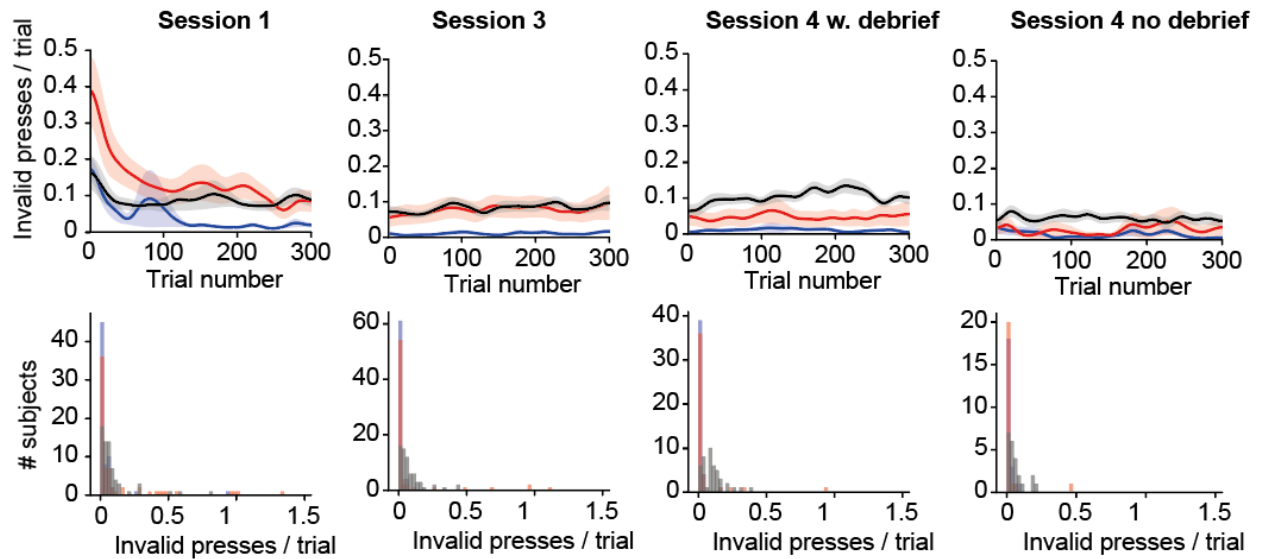

1026 **Supplementary figure S1. Invalid key presses.** Top panels show the mean number of invalid  
1027 key presses per trial as a function of trial number, Gaussian smoothed with an SD of 10 trials,  
1028 shaded area shows SEM across subjects. Bottom panels show histogram of the mean number of  
1029 invalid presses per trial across the entire session for each subject.

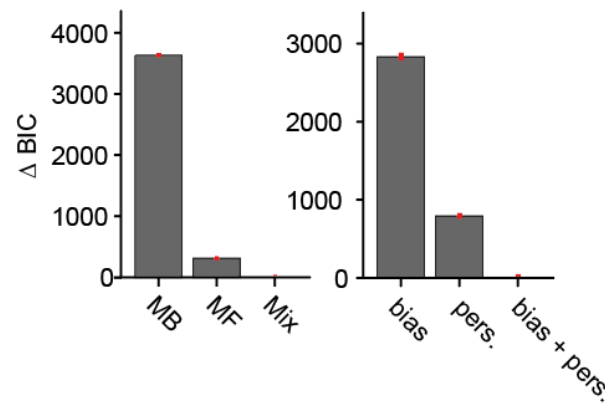

1030  
1031 **Supplementary figure S2. Model comparison.** Model comparison for sessions 1-3 of the  
1032 Fixed task. Panels show the difference in BIC score relative to the best fitting model. Left  
1033 panel, comparison of model-based (MB), model-free (MF) and MB-MF mixture (Mix) models.  
1034 Right panel, comparison of mixture model with bias parameter, perseveration parameter, and  
1035 bias + perseveration parameters.

### Healthy volunteers

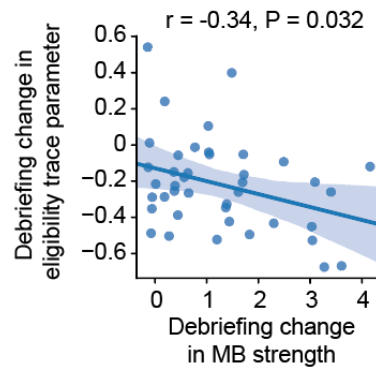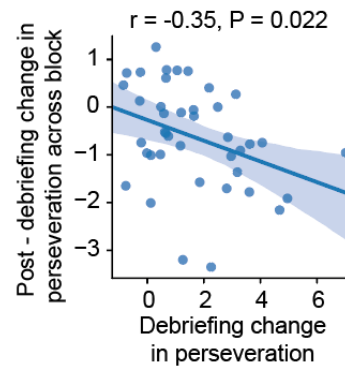

### OCD patients

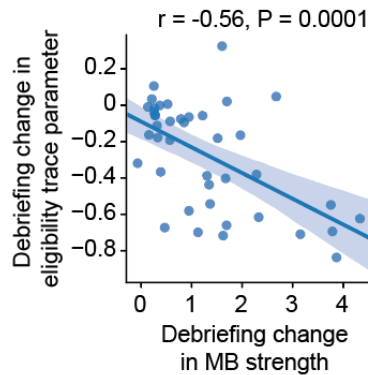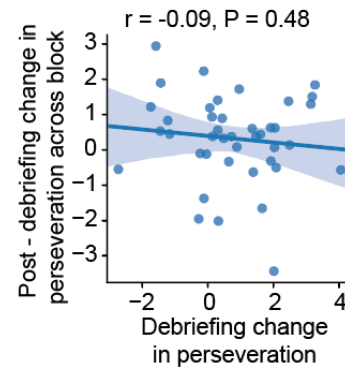

### Mood and anxiety patients

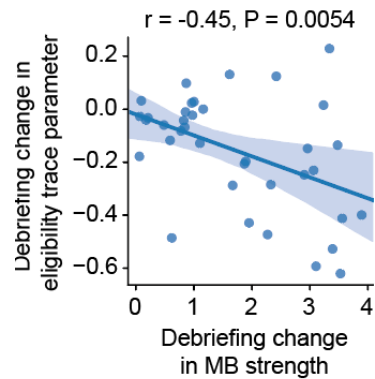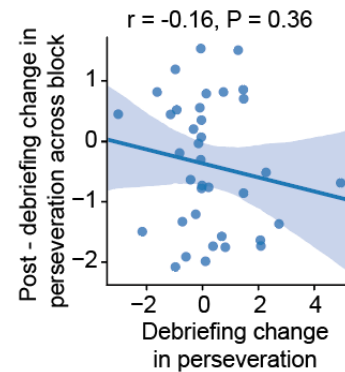

1036

1037

1038

1039

1040

1041

1042

1043

**Supplementary figure S3. Debriefing effect correlations.** Left panels – Correlation across subjects between the effect of debriefing on subjects use of model-based RL (as assessed by the RL model's model-based weight parameter) and that on the RL model's eligibility trace parameter. Right panels – Correlation between the effect of debriefing on subjects overall perseveration (as assessed by the RL models perseveration parameter), and post debriefing, their change in perseveration from early to late in blocks, assessed using logistic regression analysis of data from early (10-20 trials post block transition) and late (30-40 trials) in each block.

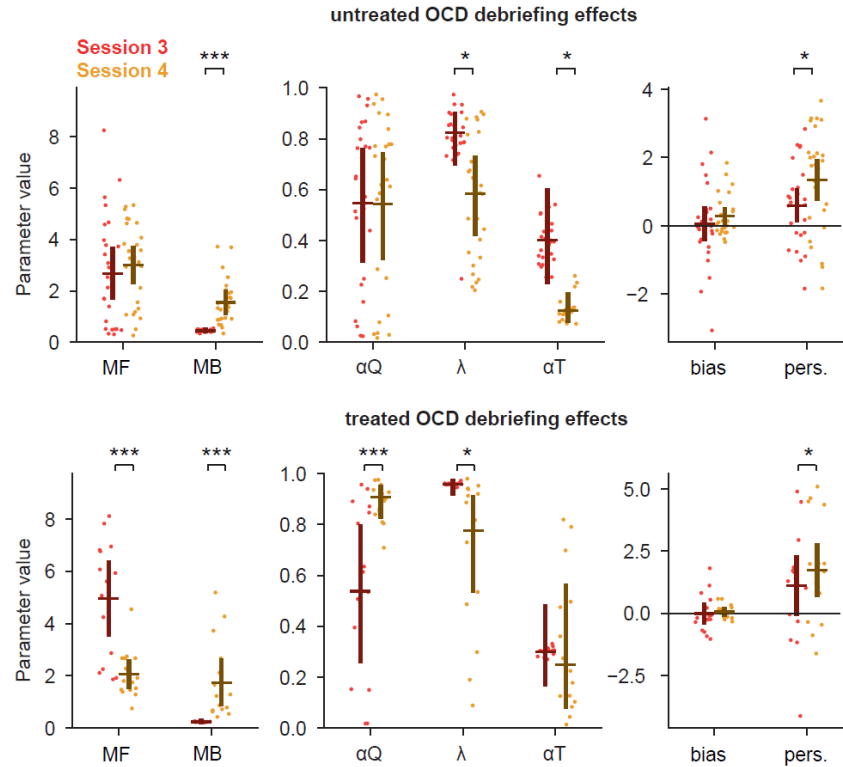

1044

1045

1046

1047

1048

1049

1050

1051

1052

1053

1054

1055

1056

1057

**Supplementary figure S4 – Comparison of debriefing effects in individuals with OCD between**

**Lisbon and New York Samples.** For each RL model parameter, dots indicate maximum a posteriori model parameter loading for individual subjects, bars indicate the population mean and 95% confidence interval on the mean. For each model parameter, permutation tests were used to assess effect of debriefing on the fitted loadings, separately for individuals with OCD recruited in New York ( $n=30$ ), who were tested in the absence of pharmacological treatment (top panel), and in Lisbon ( $n=16$ ), the majority of whom were under pharmacological treatment (bottom panel). These analyses were not performed in the remaining groups, because significant group-debriefing interactions were found only for the OCD sample (see Supplementary table sT1-3). Regarding the two variables for which such interactions were significant ( $P=0.04$  for both; Supplementary table sT2), debriefing was found to reduce the strength of model-free RL (MF) and increase the value learning rate ( $\alpha Q$ ) in treated, but not untreated, individuals with OCD. RL model parameters: MF, Model-free strength; MB, Model-based strength;  $\alpha Q$ , Value learning rate;  $\lambda$ , Eligibility trace;  $\alpha T$ , Transition probability learning rate; bias, Choice bias; pers., Choice perseveration.



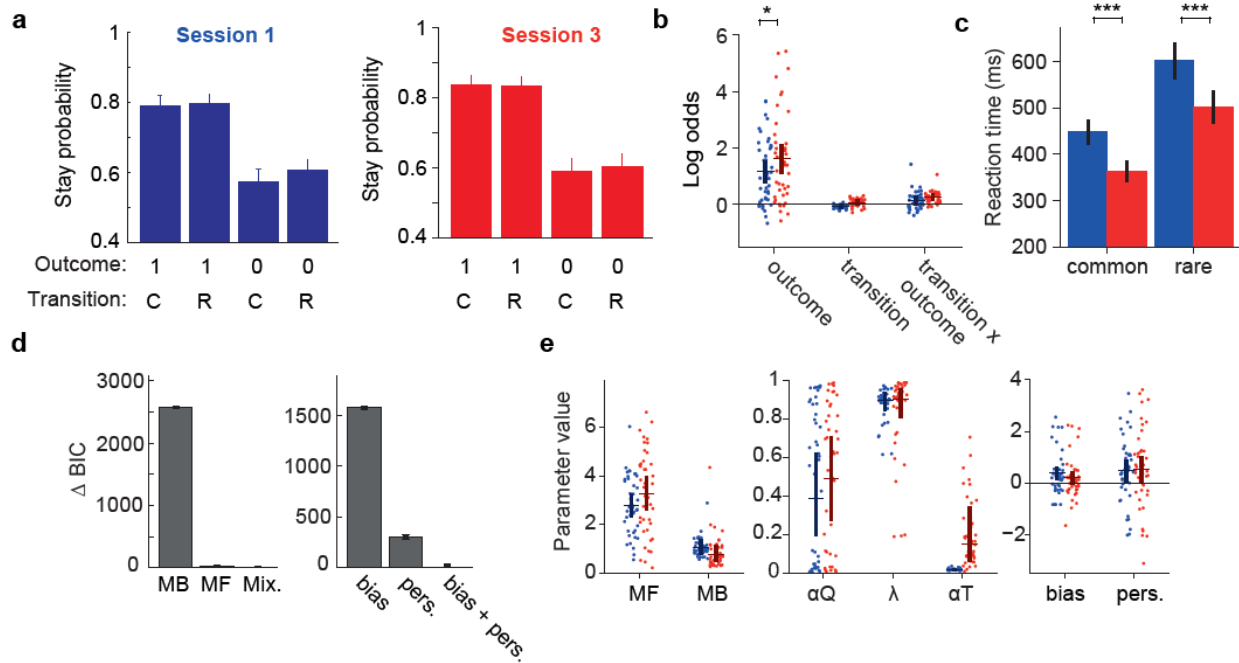

1058  
 1059 **Supplementary figure S5. Learning effects in the Changing transition probabilities task.** **a)** Stay  
 1060 probability analysis showing the probability of repeating the first step choice on the next trial as a function  
 1061 of trial outcome (rewarded or not rewarded) and state transition (common or rare). Error bars indicate the  
 1062 cross subject standard error (SEM). The left panel shows data from the first session, the right panel shows  
 1063 data from session 3. **b)** Logistic regression analysis of how the outcome (rewarded or not), transition  
 1064 (common or rare) and their interaction, predict the probability of repeating the same choice on the  
 1065 subsequent trial. Positive loading on the 'outcome' predictor indicates a tendency to repeat rewarded  
 1066 choices. Positive loading on the 'transition' predictor reflects a tendency to repeat choices followed by  
 1067 common transitions. Positive loading on the 'transition x outcome' interaction predictor indicates a tendency  
 1068 to repeat choices that were rewarded following a common transition, or that were not rewarded following a  
 1069 rare transition. Dots indicate maximum a posteriori loadings for individual subjects, bars indicate the  
 1070 population mean and 95% confidence interval on the mean. Statistical significance of differences in factor  
 1071 loadings for each predictor between session 1 (blue) and 3 (red) were evaluated using permutation tests.  
 1072 **c)** Mean first-step choice trajectories around reversals. In this and all panels, blue indicates session 1 while  
 1073 red indicates session 3. Dashed lines show exponential curves fitted to the average trajectories to obtain  
 1074 estimates of the time-course of learning following reversals. Confidence regions (mean  $\pm$  cross subject  
 1075 standard error) are represented by shaded areas. **d)** Bayesian Information Criteria (BIC) model comparison  
 1076 for sessions 1-3. Left panel, comparison of model-based (MB), model-free (MF) and mixture (MF+MB)  
 1077 models. Right panel, comparison of mixture model with bias parameter, perseveration parameter, and bias  
 1078 + perseveration parameters. **e)** Comparison of mixture model fits between session 1 and session 3. RL  
 1079 model parameters: MF, Model-free strength; MB, Model-based strength;  $\alpha Q$ , Value learning rate;  $\lambda$ ,  
 1080 Eligibility trace;  $\alpha T$ , Transition probability learning rate; bias, Choice bias; pers., Choice perseveration.

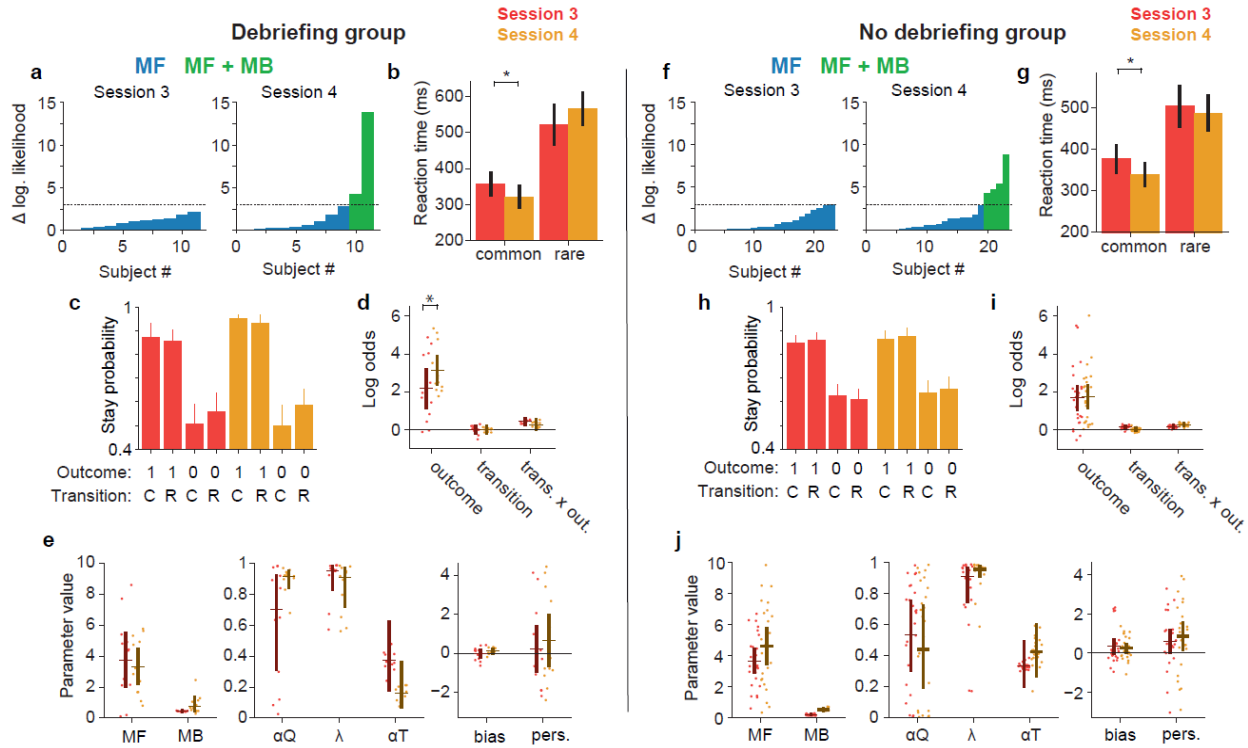

1081

1082

1083

1084

1085

1086

1087

1088

1089

1090

1091

1092

1093

1094

1095

1096

1097

1098

1099

1100

1101

1102

1103

1104

**Supplementary figure S6. Effects of explicit knowledge in the Changing transition probabilities**

**task.** (a, f) Per-subject likelihood ratio test for use of model-based strategy on session 3 (left panel) and session 4 (right panel). Data was analysed separately for groups with (A) and without (F) debriefing. Y-axis shows difference in log likelihood between mixture (model-free + model-based) RL model and model-free only RL model. Blue bars indicate subjects for which likelihood ratio test favours model-free only model, green bars indicate subjects for which test favours mixture model, using a  $p < 0.05$  threshold for rejecting the simpler model. We compared sessions 3 and 4 only in the subjects for whom a likelihood ratio test indicated that model-based RL was not used in session 3. (b, g) Mean first-step choice trajectories around reversals. In these and all remaining panels, red indicates session 3 (before instruction) while gold indicates session 4 (after instruction). Dashed lines show exponential curves fitted to the average trajectories to obtain estimates of the adaptation time-course of learning following reversals. Confidence regions (mean  $\pm$  across subject standard error) are represented by shaded areas. (c, h) Stay probability analysis showing the probability of repeating the first step choice on the next trial as a function of trial outcome (rewarded or not rewarded) and state transition (common or rare). Error bars indicated the cross subject standard error of the mean (SEM). In each group data was analysed separately for session 3 (red graph) and session 4 (gold graph). (d, i) Logistic regression analysis of how the outcome (rewarded or not), transition (common or rare) and their interaction, predict the probability of repeating the same choice on the subsequent trial. (e, j) Comparison of mixture model fits between session 3 (red) and session 4 (gold) in the group without instruction (left panels) and the group with instruction (right panels). RL model parameters: MF, Model-free strength; MB, Model-based strength;  $\alpha Q$ , Value learning rate;  $\lambda$ , Eligibility trace;  $\alpha T$ , Transition probability learning rate; bias, Choice bias; pers., Choice perseveration.

1105 **Information provided to study participants**

1106

1107 **A) Information before task**

1108

1109 “You will now play a game in order to gain of as many rewards as possible.

1110 Rewards will be represented in the screen as coins. Every time you get a coin, it will show up in the screen  
1111 and it will be added to your total number of rewards. The number of coins you get will determine the value  
1112 of the gift-card that you will receive at the end of your participation.

1113 You will perform 1200 trials and in each trial you can get either one coin or no coin. At the end of those  
1114 1200 trials, 400 will be randomly chosen to count the final number of coins.

1115 The minimum amount of money in your gift card will be 10 euros. For each coin that you get above 150  
1116 coins, you will get an increase of 20 cents in your gift card. Therefore, if you get 175 coins the amount will  
1117 be 15 euros, 200 coins correspond to 20 euros and 225 coins correspond to the maximum amount that the  
1118 gift-card can have, which is 25 euros. Amounts will be distributed rounded to the closer multiple of 5 euros.

1119 At the top left corner of the screen, there will be a coin counter which shows how many coins you got in  
1120 each session. That number may not have direct correspondence with the final amount, since that amount  
1121 will be calculated using a random sample of trials.

1122 You will play the game using the arrow keys after stimuli show up in the screen.

1123 Each session of the game will last for approximately 15 minutes. Once the session is completed, a sentence  
1124 thanking you for your participation will show up in the screen. When that screen shows up you should leave  
1125 the room.

1126

1127

1128

1129

1130

1131

1132

1133

1134

1135

1136

1137

1138

1139

1140

1141

1142

1143

1144

1145 **B) Debriefing – Fixed transition probabilities version**

1146

1147 We will now explain the structure of the game.

1148 First the two central circles (upper and lower) are yellow, indicating that you can choose one of them.

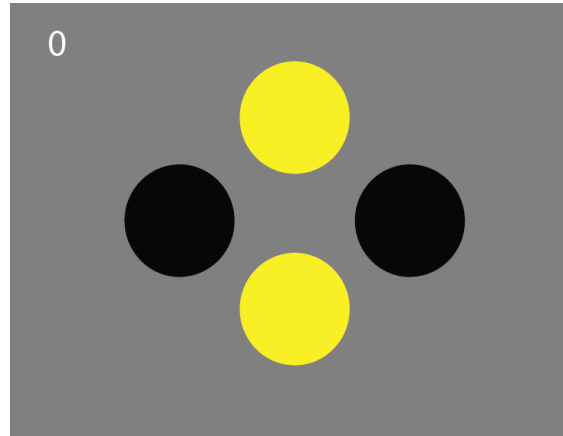

1149

1150

1151 If you press the upper arrow key, you will choose the upper circle. If you press the lower arrow key, you will  
1152 choose the lower circle.

1153 After you choose the upper or the lower circle, one of the two side circles will light up, i. e., will turn yellow  
1154 (left or right). After you press the arrow key that corresponds to the lateral circle that lit up (left or right), a  
1155 coin may or may not appear.

1156 The probability according to which the central circles give access to either one of the lateral circle also  
1157 follows some rules.

1158 If you choose the upper circle, one of two different things can happen. Most of the times (actually 80% of  
1159 the times) the right side circle will light up. Rarely, the left side circle will light up.

1160 If you choose the lower circle, most of the times (actually 80% of the times) the left side circle will light up.  
1161 On the remaining occasions, the right side circle will light up.

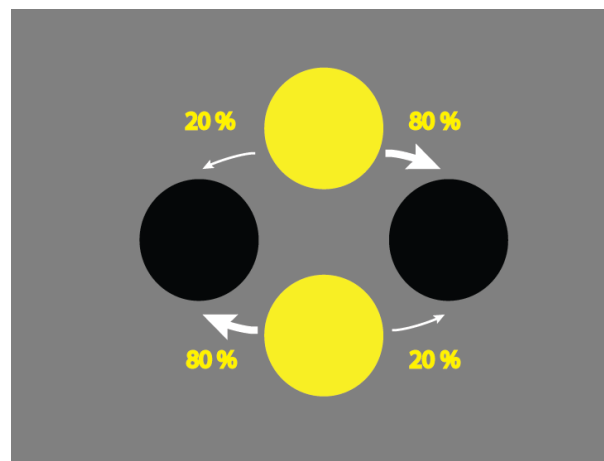

1162

1163

1164 The left and right circles give access to the rewards, which are symbolized as coins. However, the  
1165 probability of winning a coin is not equal on the left or on the right: it is always higher on one of the sides.

1166 Sometimes it is higher on the left and sometimes it is higher on the right. The side in which that probability  
1167 is higher changes after 20 or more trials.

1168

1169 You will now play a last session, with the same rules. Good luck!

1170

1171

1172

1173

1174

1175

1176

1177

1178

1179

1180

1181

1182

1183

1184

1185

1186

1187

1188

1189

1190

1191

1192

1193

1194

1195

1196

1197

1198

1199

1200

1201

1202



1203 **C) Debriefing – Changing transition probabilities version**

1204

1205 We will now explain the structure of the game.

1206 First the two central circles (upper and lower) are yellow, indicating that you can choose one of them.

1207

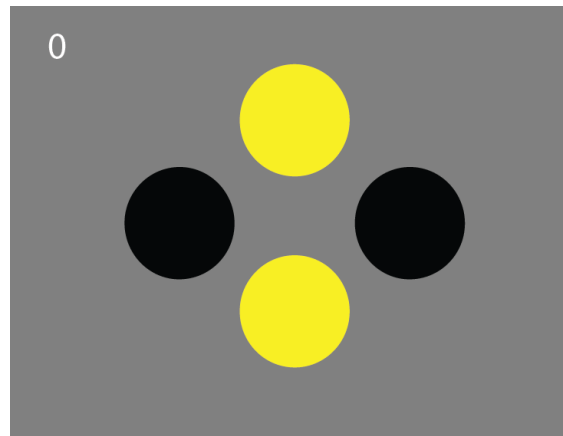

1208

1209

1210 If you press the upper arrow key, you will choose the upper circle. If you press the lower arrow key, you will  
1211 choose the lower circle.

1212 After you choose the upper or the lower circle, one of the two side circles will light up, i. e., will turn yellow  
1213 (left or right). After you press the arrow key that corresponds to the lateral circle that lit up (left or right), a  
1214 coin may or may not appear.

1215

1216 The probability according to which the central circles give access to either one of the lateral circle also  
1217 follows some rules. The game is divided in two types of blocks.

1218 In “A” blocks, choosing the upper circle leads more frequently (80% of the times) to the lighting up of the  
1219 right side circle. On the other hand, in these blocks, choosing the lower circle, leads more frequently (80%  
1220 of the times) to the lighting up of the left side circle.

1221 In “B” blocks, choosing the upper circle leads more frequently (80% of the times) to the lighting up of the  
1222 left side circle. On the other hand, in these blocks, choosing the lower circle, leads more frequently (80%  
1223 of the times) to the lighting up of the right side circle.

1224

1225 Therefore, in “A” blocks, if you choose the upper circle, one of two things can happen. Most of the times  
1226 (actually 80% of the times), the right side circle will light up. Rarely (20% of the time), the left side circle will  
1227 light up.

1228 In these same “A” blocks, if you choose the lower circle, one of two things can happen. Most of the times  
1229 (actually 80% of the times), the left side circle will light up. Rarely (20% of the time), the right side circle will  
1230 light up.

1231

1232 Schematic representation of the structure of “A” blocks:

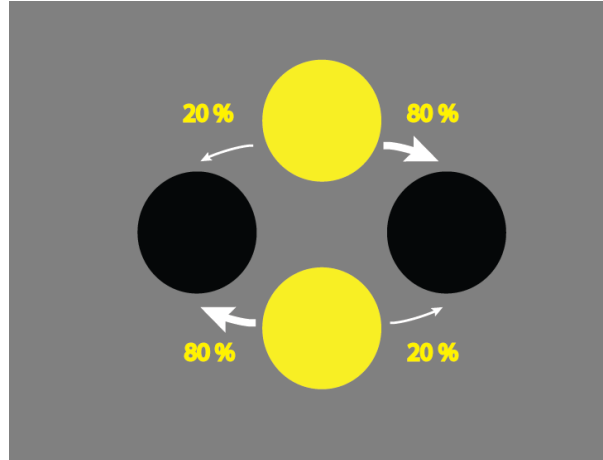

1233

1234

1235 In “B” blocks, if you choose the upper circle, one of two things can happen. Most of the times (actually 80%  
1236 of the times), the left side circle will light up. Rarely (20% of the time), the right side circle will light up.

1237 In these same “B” blocks, if you choose the lower circle, one of two things can happen. Most of the times  
1238 (actually 80% of the times), the right side circle will light up. Rarely (20% of the time), the left side circle  
1239 will light up.

1240

1241 Schematic representation of the structure of “B” blocks:

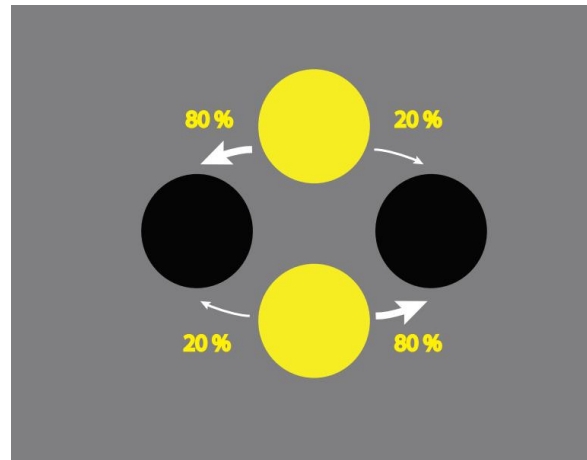

1242

1243

1244 “A” blocks and “B” blocks alternate between them after 20 or more trials.

1245 The left and right circles give access to the rewards, which are symbolized as coins. However, the  
1246 probability of winning a coin is not the equal on the left or on the right: it is always higher on one of the  
1247 sides. Sometimes it is higher on the left and sometimes it is higher on the right. The side in which that  
1248 probability is higher changes after 20 or more trials.

1249 You will now play a last session, with the same rules. Good luck!

1250

1251
